# Supplementary material for: An integrated view of the structure and function of the human 4D nucleome
Source: Springer Nature journal article supplement (doi:10.1038/s41586-025-09890-3), 2025-12-17
Supplement: MOESM1 [file 41586_2025_9890_MOESM1_ESM.pdf › 41586_2025_9890_MOESM1_ESM.pdf]

---

## Supplementary information

---

# An integrated view of the structure and function of the human 4D nucleome

---

In the format provided by the  
authors and unedited

**Supplementary Table I: List of companion papers**

| PMID     | Reference                                                                                                                                                                                                                                                                                                                                  |
|----------|--------------------------------------------------------------------------------------------------------------------------------------------------------------------------------------------------------------------------------------------------------------------------------------------------------------------------------------------|
| 29522506 | Barton, C., Morganella, S., Odegard-Fougner, O., Alexander, S., Ries, J., Fitzgerald, T., Ellenberg, J., and Birney, E. (2018). ChromoTrace: Computational reconstruction of 3D chromosome configurations for super-resolution microscopy. <i>PLoS Comput Biol</i> 14, e1006002. 10.1371/journal.pcbi.1006002.                             |
| 32358536 | Trzaskoma, P., Ruszczycki, B., Lee, B., Pels, K.K., Krawczyk, K., Bokota, G., Szczepankiewicz, A.A., Aaron, J., Walczak, A., Sliwinska, M.A., et al. (2020). Ultrastructural visualization of 3D chromatin folding using volume electron microscopy and DNA in situ hybridization. <i>Nat Commun</i> 11, 2120. 10.1038/s41467-020-15987-2. |
| 33446254 | Wang, Y., Zhang, Y., Zhang, R., van Schaik, T., Zhang, L., Sasaki, T., Peric-Hupkes, D., Chen, Y., Gilbert, D.M., van Steensel, B., et al. (2021). SPIN reveals genome-wide landscape of nuclear compartmentalization. <i>Genome Biol</i> 22, 36. 10.1186/s13059-020-02253-3.                                                              |
| 33963348 | Fiorillo, L., Musella, F., Conte, M., Kempfer, R., Chiariello, A.M., Bianco, S., Kukalev, A., Irastorza-Azcarate, I., Esposito, A., Abraham, A., et al. (2021). Comparison of the Hi-C, GAM and SPRITE methods using polymer models of chromatin. <i>Nat Methods</i> 18, 482-490. 10.1038/s41592-021-01135-1.                              |
| 34106828 | Strom, A.R., Biggs, R.J., Banigan, E.J., Wang, X., Chiu, K., Herman, C., Collado, J., Yue, F., Ritland Politz, J.C., Tait, L.J., et al. (2021). HP1alpha is a chromatin crosslinker that controls nuclear and mitotic chromosome mechanics. <i>Elife</i> 10. 10.7554/eLife.63972.                                                          |
| 34446921 | Yu, M., Abnoui, A., Zhang, Y., Li, G., Lee, L., Chen, Z., Fang, R., Lagler, T.M., Yang, Y., Wen, J., et al. (2021). SnapHiC: a computational pipeline to identify chromatin loops from single-cell Hi-C data. <i>Nat Methods</i> 18, 1056-1059. 10.1038/s41592-021-01231-2.                                                                |
| 34480151 | Akgol Oksuz, B., Yang, L., Abraham, S., Venev, S.V., Krietenstein, N., Parsi, K.M., Ozadam, H., Oomen, M.E., Nand, A., Mao, H., et al. (2021). Systematic evaluation of chromosome conformation capture assays. <i>Nat Methods</i> 18, 1046-1055. 10.1038/s41592-021-01248-7.                                                              |
| 34635838 | Zhang, R., Zhou, T., and Ma, J. (2022). Multiscale and integrative single-cell Hi-C analysis with Higashi. <i>Nat Biotechnol</i> 40, 254-261. 10.1038/s41587-021-01034-y.                                                                                                                                                                  |
| 34663924 | Janssens, D.H., Meers, M.P., Wu, S.J., Babaeva, E., Meshinchi, S., Sarthy, J.F., Ahmad, K., and Henikoff, S. (2021). Automated CUT&Tag profiling of chromatin heterogeneity in mixed-lineage leukemia. <i>Nat Genet</i> 53, 1586-1596. 10.1038/s41588-021-00941-9.                                                                         |
| 34789882 | Winick-Ng, W., Kukalev, A., Harabula, I., Zea-Redondo, L., Szabo, D., Meijer, M., Serebreni, L., Zhang, Y., Bianco, S., Chiariello, A.M., et al. (2021). Cell-type specialization is encoded by specific chromatin topologies. <i>Nature</i> 599, 684-691. 10.1038/s41586-021-04081-2.                                                     |
| 34862501 | Hammer, M., Huisman, M., Rigano, A., Boehm, U., Chambers, J.J., Gaudreault, N., North, A.J., Pimentel, J.A., Sudar, D., Bajcsy, P., et al. (2021). Towards community-driven metadata standards for light microscopy: tiered specifications extending the OME model. <i>Nat Methods</i> 18, 1427-1440. 10.1038/s41592-021-01327-9.          |
| 34862503 | Rigano, A., Ehmsen, S., Ozturk, S.U., Ryan, J., Balashov, A., Hammer, M., Kirli, K., Boehm, U., Brown, C.M., Bellve, K., et al. (2021). Micro-Meta App: an interactive tool for collecting microscopy metadata based on community specifications. <i>Nat Methods</i> 18, 1489-1495. 10.1038/s41592-021-01315-z.                            |
| 35412637 | Li, D., Purushotham, D., Harrison, J.K., Hsu, S., Zhuo, X., Fan, C., Liu, S., Xu, V., Chen, S., Xu, J., et al. (2022). WashU Epigenome Browser update 2022. <i>Nucleic Acids Res</i> 50, W774-W781. 10.1093/nar/gkac238.                                                                                                                   |
| 35440119 | Feng, F., Yao, Y., Wang, X.Q.D., Zhang, X., and Liu, J. (2022). Connecting high-resolution 3D chromatin organization with epigenomics. <i>Nat Commun</i> 13, 2054. 10.1038/s41467-022-29695-6.                                                                                                                                             |
| 35501320 | Reiff, S.B., Schroeder, A.J., Kirli, K., Cosolo, A., Bakker, C., Mercado, L., Lee, S., Veit, A.D., Balashov, A.K., Vitzthum, C., et al. (2022). The 4D Nucleome Data Portal as a resource for searching and visualizing curated nucleomics data. <i>Nat Commun</i> 13, 2365. 10.1038/s41467-022-29697-4.                                   |
| 35676475 | Emerson, D.J., Zhao, P.A., Cook, A.L., Barnett, R.J., Klein, K.N., Saulebekova, D., Ge, C., Zhou, L., Simandi, Z., Minsk, M.K., et al. (2022). Cohesin-mediated loop anchors confine the locations of human replication origins. <i>Nature</i> 606, 812-819. 10.1038/s41586-022-04803-0.                                                   |

|          |                                                                                                                                                                                                                                                                                                                                                             |
|----------|-------------------------------------------------------------------------------------------------------------------------------------------------------------------------------------------------------------------------------------------------------------------------------------------------------------------------------------------------------------|
| 35817938 | Boninsegna, L., Yildirim, A., Polles, G., Zhan, Y., Quinodoz, S.A., Finn, E.H., Guttman, M., Zhou, X.J., and Alber, F. (2022). Integrative genome modeling platform reveals essentiality of rare contact events in 3D genome organizations. <i>Nat Methods</i> 19, 938-949. 10.1038/s41592-022-01527-x.                                                     |
| 35860407 | Sengupta, K., Denkiewicz, M., Chilinski, M., Szczepinska, T., Mollah, A.F., Korsak, S., D'Souza, R., Ruan, Y., and Plewczynski, D. (2022). Multi-scale phase separation by explosive percolation with single-chromatin loop resolution. <i>Comput Struct Biotechnol J</i> 20, 3591-3603. 10.1016/j.csbj.2022.06.063.                                        |
| 35864166 | Li, D., Harrison, J.K., Purushotham, D., and Wang, T. (2022). Exploring genomic data coupled with 3D chromatin structures using the WashU Epigenome Browser. <i>Nat Methods</i> 19, 909-910. 10.1038/s41592-022-01550-y.                                                                                                                                    |
| 35864167 | Zhu, X., Zhang, Y., Wang, Y., Tian, D., Belmont, A.S., Swedlow, J.R., and Ma, J. (2022). Nucleome Browser: an integrative and multimodal data navigation platform for 4D Nucleome. <i>Nat Methods</i> 19, 911-913. 10.1038/s41592-022-01559-3.                                                                                                              |
| 36746940 | Choudhary, M.N.K., Quaid, K., Xing, X., Schmidt, H., and Wang, T. (2023). Widespread contribution of transposable elements to the rewiring of mammalian 3D genomes. <i>Nat Commun</i> 14, 634. 10.1038/s41467-023-36364-9.                                                                                                                                  |
| 37336949 | Beagrie, R.A., Thieme, C.J., Annunziatella, C., Baugher, C., Zhang, Y., Schueler, M., Kukalev, A., Kempfer, R., Chiariello, A.M., Bianco, S., et al. (2023). Multiplex-GAM: genome-wide identification of chromatin contacts yields insights overlooked by Hi-C. <i>Nat Methods</i> 20, 1037-1047. 10.1038/s41592-023-01903-1.                              |
| 37580627 | Yildirim, A., Hua, N., Boninsegna, L., Zhan, Y., Polles, G., Gong, K., Hao, S., Li, W., Zhou, X.J., and Alber, F. (2023). Evaluating the role of the nuclear microenvironment in gene function by population-based modeling. <i>Nat Struct Mol Biol</i> 30, 1193-1206. 10.1038/s41594-023-01036-1.                                                          |
| 37845234 | Calandrelli, R., Wen, X., Charles Richard, J.L., Luo, Z., Nguyen, T.C., Chen, C.J., Qi, Z., Xue, S., Chen, W., Yan, Z., et al. (2023). Genome-wide analysis of the interplay between chromatin-associated RNA and 3D genome organization in human cells. <i>Nat Commun</i> 14, 6519. 10.1038/s41467-023-42274-7.                                            |
| 37935964 | Janssens, D.H., Greene, J.E., Wu, S.J., Codomo, C.A., Minot, S.S., Furlan, S.N., Ahmad, K., and Henikoff, S. (2024). Scalable single-cell profiling of chromatin modifications with sciCUT&Tag. <i>Nat Protoc</i> 19, 83-112. 10.1038/s41596-023-00905-9.                                                                                                   |
| 38538789 | Wen, X., Luo, Z., Zhao, W., Calandrelli, R., Nguyen, T.C., Wan, X., Charles Richard, J.L., and Zhong, S. (2024). Single-cell multiplex chromatin and RNA interactions in ageing human brain. <i>Nature</i> 628, 648-656. 10.1038/s41586-024-07239-w.                                                                                                        |
| 38589516 | Xiong, K., Zhang, R., and Ma, J. (2024). scGHOST: identifying single-cell 3D genome subcompartments. <i>Nat Methods</i> 21, 814-822. 10.1038/s41592-024-02230-9.                                                                                                                                                                                            |
| 39271748 | Kumar, P., Gholamalamdari, O., Zhang, Y., Zhang, L., Vertii, A., van Schaik, T., Peric-Hupkes, D., Sasaki, T., Gilbert, D.M., van Steensel, B., et al. (2024). Nucleolus and centromere Tyramide Signal Amplification-Seq reveals variable localization of heterochromatin in different cell types. <i>Commun Biol</i> 7, 1135. 10.1038/s42003-024-06838-7. |
| 39681766 | Yu, M., Zemke, N.R., Chen, Z., Juric, I., Hu, R., Raviram, R., Abnoui, A., Fang, R., Zhang, Y., Gorkin, D.U., et al. (2025). Integrative analysis of the 3D genome and epigenome in mouse embryonic tissues. <i>Nat Struct Mol Biol</i> 32, 479-490. 10.1038/s41594-024-01431-2.                                                                            |
| 39948644 | Zhan, Y., Yildirim, A., Boninsegna, L., and Alber, F. (2025). Unveiling the role of chromosome structure morphology on gene function through chromosome conformation analysis. <i>Genome Biol</i> 26, 30. 10.1186/s13059-024-03472-8.                                                                                                                       |
| 40279158 | Gholamalamdari, O., van Schaik, T., Wang, Y., Kumar, P., Zhang, L., Zhang, Y., Gonzalez, G.A.H., Vouzas, A.E., Zhao, P.A., Gilbert, D.M., et al. (2025). Major nuclear locales define nuclear genome organization and function beyond A and B compartments. <i>Elife</i> 13. 10.7554/eLife.99116.                                                           |
| 40329044 | Irastorza-Azcarate, I., Kukalev, A., Kempfer, R., Thieme, C.J., Mastrobuoni, G., Markowski, J., Loof, G., Sparks, T.M., Brookes, E., Natarajan, K.N., et al. (2025). Extensive folding variability between homologous chromosomes in mammalian cells. <i>Mol Syst Biol</i> 21, 735-775. 10.1038/s44320-025-00107-3.                                         |

## Supplementary Figure 1

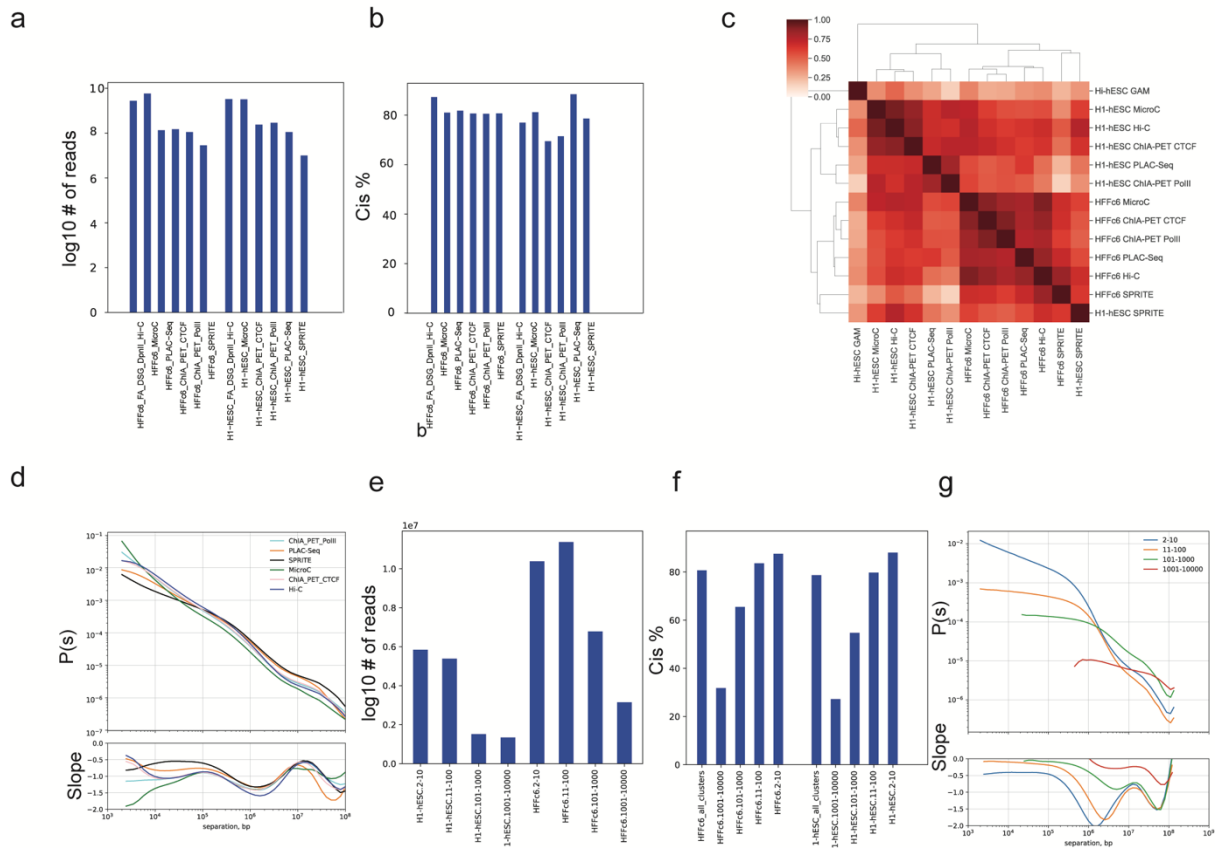

### Legend Supplementary Figure 1

#### Quantitative metrics of data obtained with different chromatin interaction mapping methods

- The number of reads obtained for Hi-C, Micro-C, ChIA PET, PLAC Seq, SPRITE datasets
- The percentage of *cis* contacts for data obtained with each method indicated.
- HiCRep {Yardimci, 2019 #1896} correlations of insulation profiles obtained with Hi-C, Micro-C, ChIA PET, PLAC Seq, GAM, and SPRITE
- $P(s)$  plot showing distance dependent contact probability of interactions detected with all protocols applied to HFFc6 cells (top). Derivative of the  $P(s)$  plots shown in panel d (bottom).
- The number of fragments in each SPRITE cluster. Cluster sizes are 2-10, 11-100, 101-1000, 1001-10000 fragments.
- The percentage of *cis* contacts in SPRITE clusters of indicated cluster size, for HFFc6 and H1-hESC cells.
- $P(s)$  plot showing distance dependent contact probability of interactions detected with different SPRITE cluster sizes for HFFc6 cells (top). Derivative of the  $P(s)$  plots shown in the bottom panel.



Supplementary Figure 2

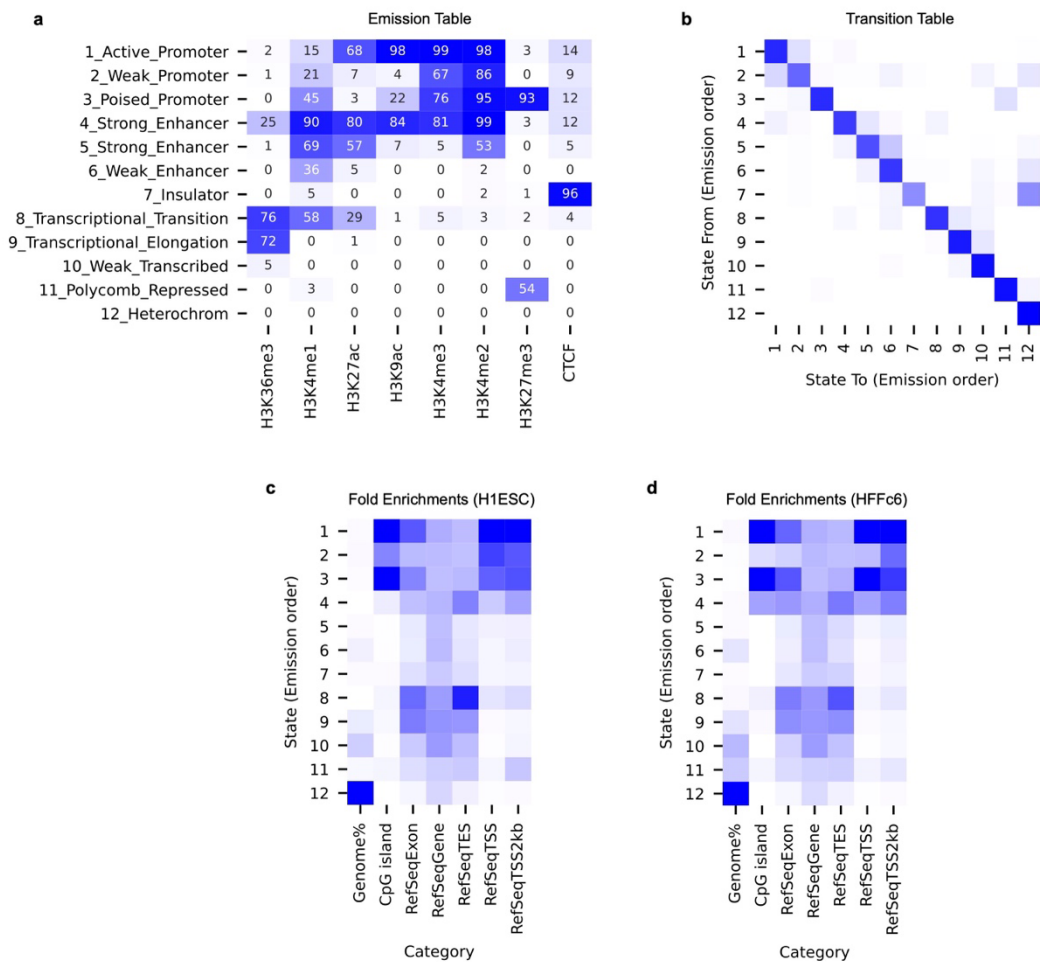

Legend Supplementary Figure 2

Consensus ChromHMM segmentation in H1-hESC and HFFc6.

**a.** Heatmap of emission parameters for the ChromHMM model.

**b.** Heatmap of transition parameters for the ChromHMM model.

**c-d.** Relative genomic coverage of each chromatin state and fold enrichment of chromatin states for selected genomic annotations in H1-hESC (c) and HFFc6 (d). TSS, transcription start site; TES, transcription end site.

## Supplementary Figure 3

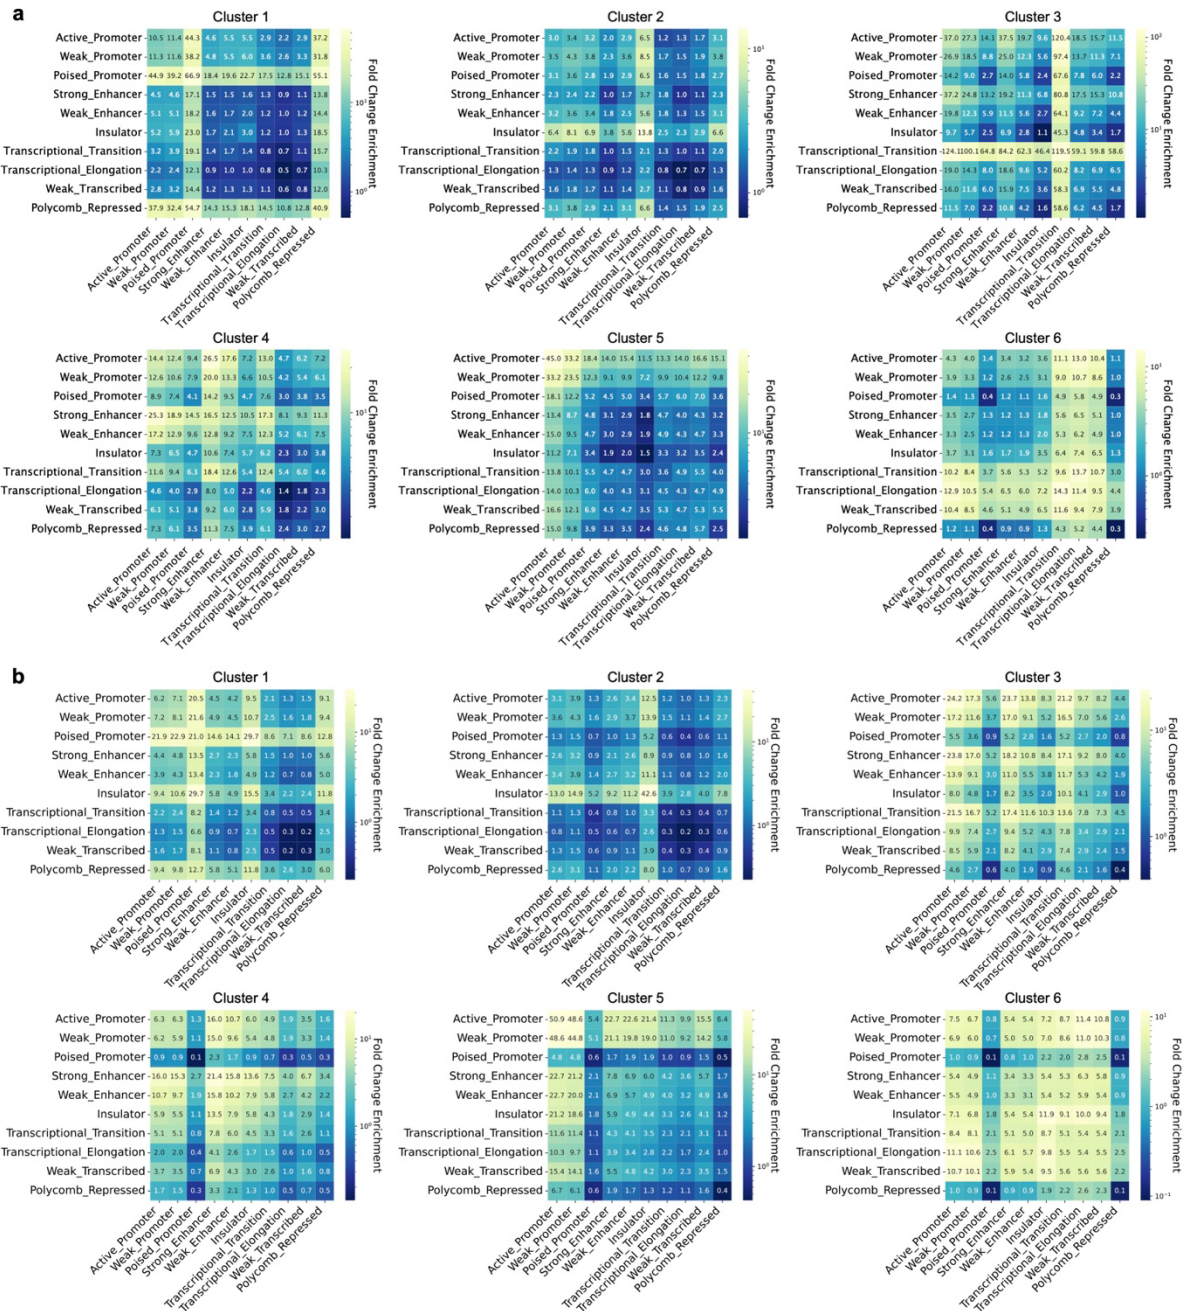

## Legend Supplementary Figure 3

Fold-enrichment scores of ChromHMM states for different loop clusters revealed by the UMAP in H1-hESC (a) and HFFc6 (b).

## Supplementary Figure 4

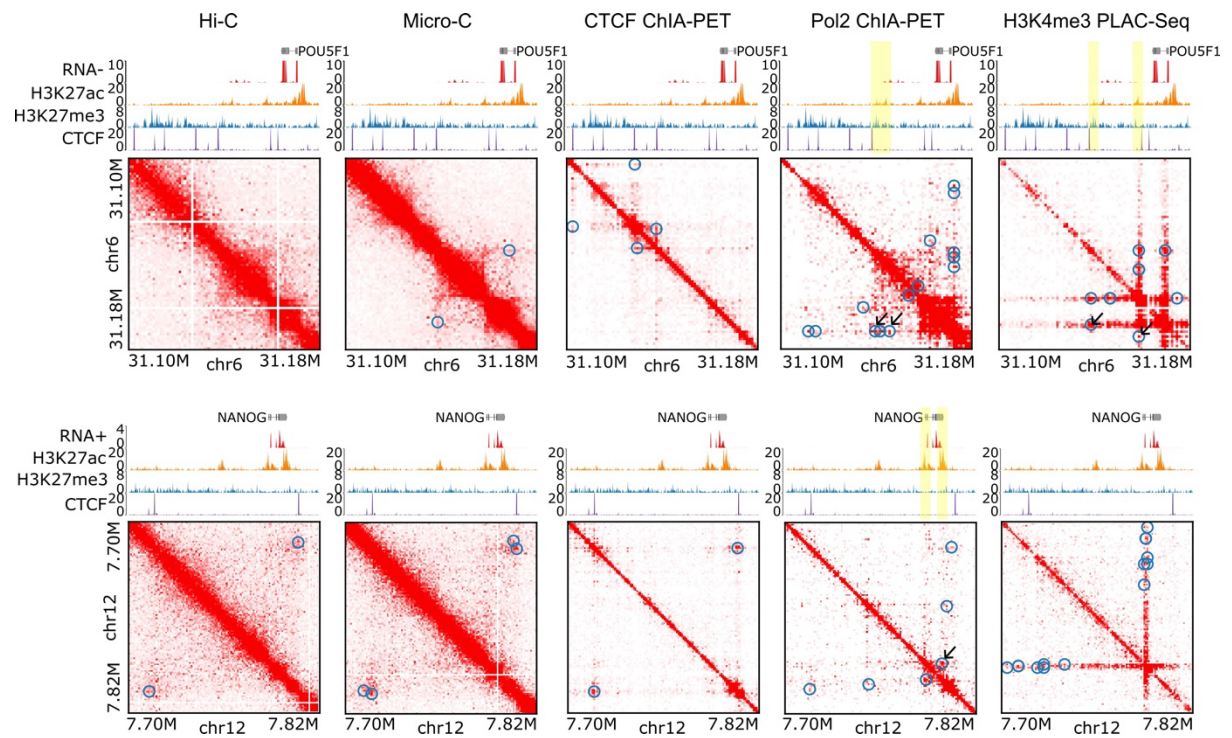

## Legend Supplementary Figure 4

**Two additional examples illustrating differences among platforms in detecting transcription-related loops.**

Contact maps are plotted at 1 kb resolution, with chromatin loops detected by each platform marked by blue circles. Loops linking the indicated genes (*POU5F1* in the first example and *NANOG* in the second) to distal enhancers are indicated by black arrows, and the interacting distal enhancers are highlighted with yellow-shaded bars.



Supplementary Figure 5

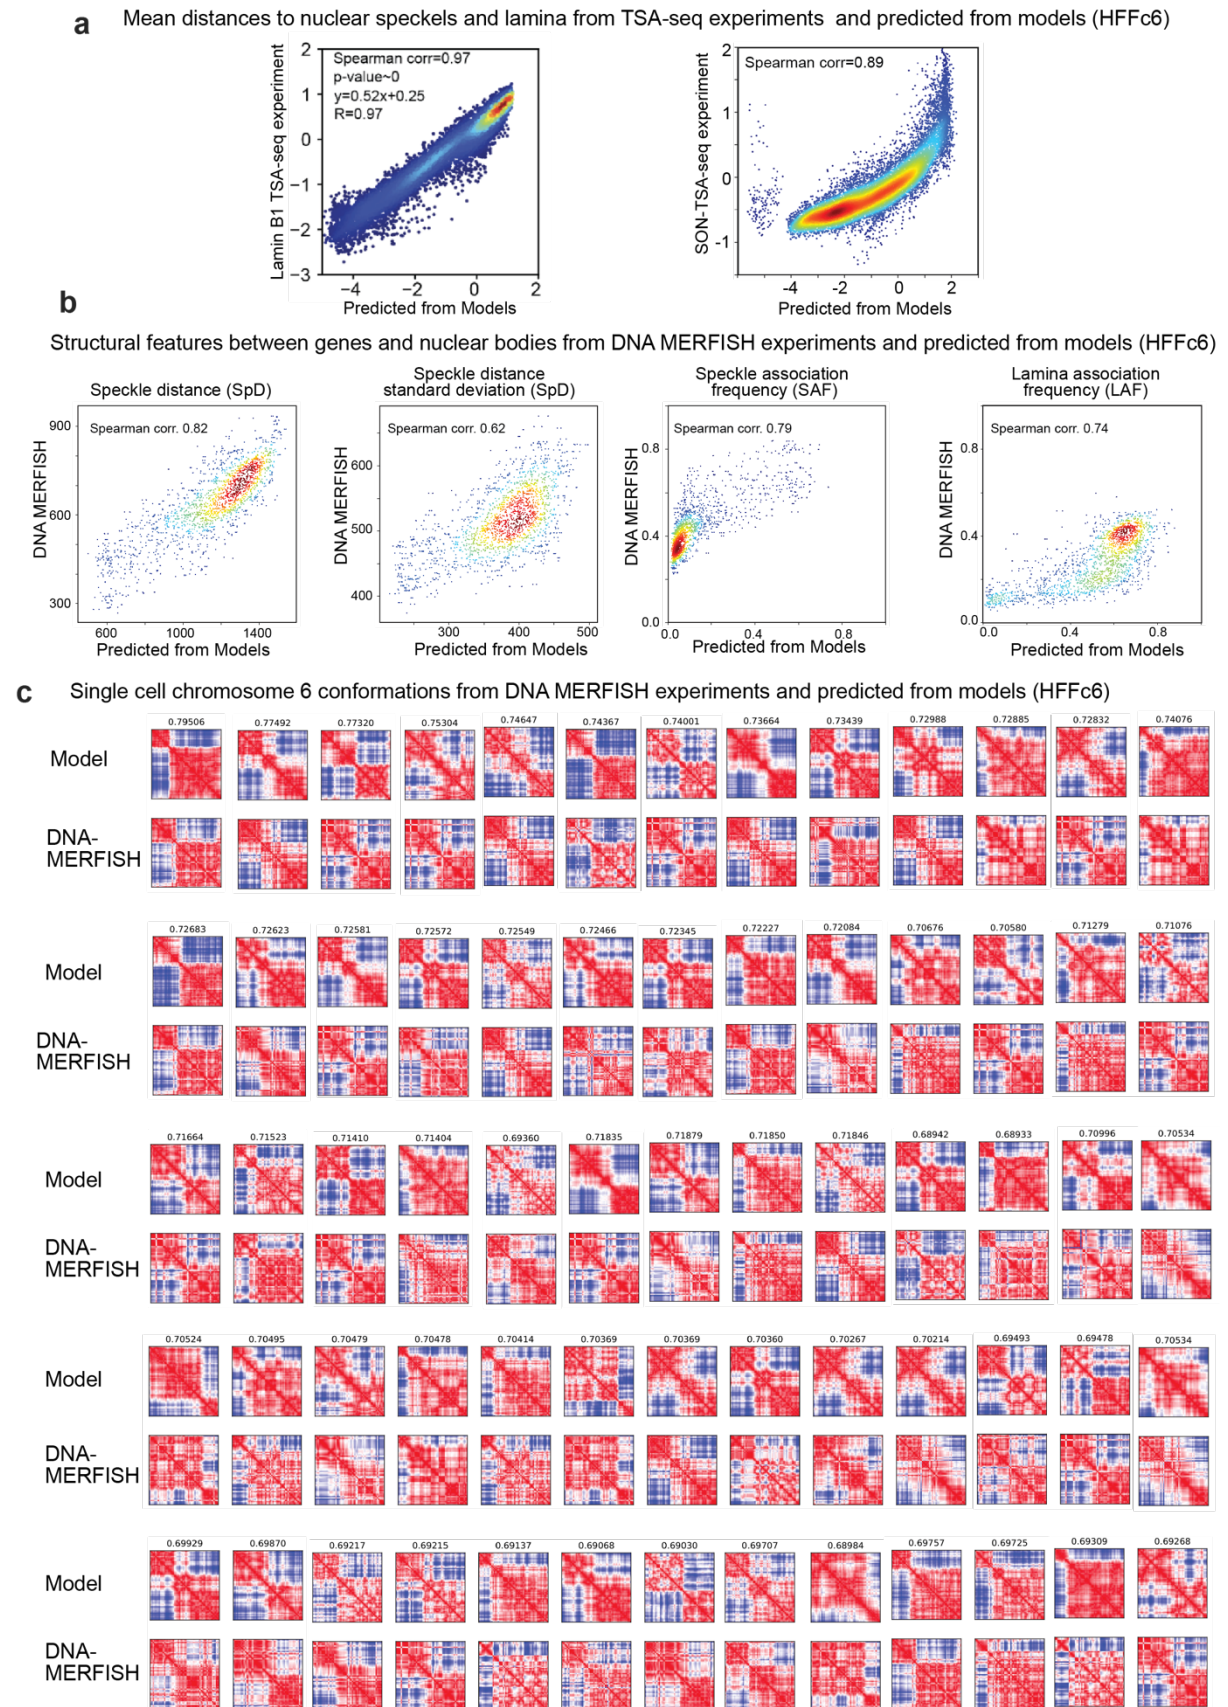

### **Legend Supplementary Figure 5**

#### **Assessment of 3D genome structure models against independent experimental data.**

Assessment of genome structure models with independent experimental data.

**a.** Genome-wide correlation of TSA-seq data from experiment and predicted from our models (Left, Lamin B1 TSA-seq {Gholamalamdari, 2024 #1923}. Right, SON TSA-seq {Zhang, 2021 #1892}.

**b.** Genome-wide correlation of structure features between genome structures from DNA-MERFISH chromosome tracing experiments {Su, 2020 #1915} and predictions from our models. (From left to right, mean speckle distance (SpD), standard deviation of mean speckle distance in structure population, Speckle association frequency (SAF), Lamina association frequency (LAF)). **c.**

Comparison of single cell distance matrices of chromosome 6 from simulated models (Top panel) and DNA-MERFISH imaging data {Su, 2020 #1915} (Bottom panel). Numbers above the distance matrices represent Pearson correlations between distance matrices from models and experiment.

## Supplementary Figure 6

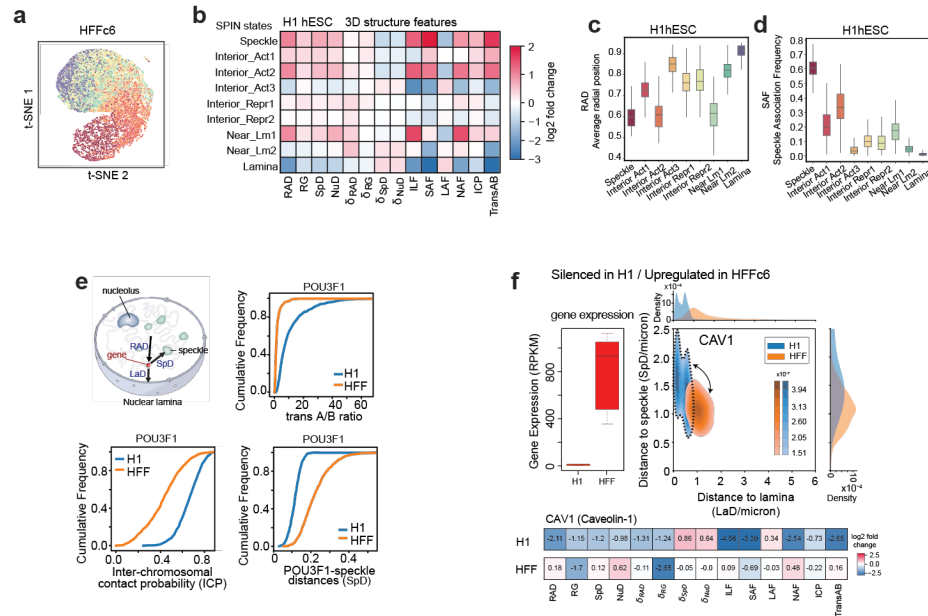

### Legend Supplementary Figure 6

#### Genome-structure-function relationship

- t-SNE projections of structure feature vectors for chromatin in different SPIN states in HFFc6. (Color scheme of SPIN states defined as in panel c).
- Log-fold enrichment of 14 3D structural features for chromatin in different SPIN states calculated from the population of models in H1 h-ESC cells.
- Distributions of normalized radial positions for chromatin in different SPIN states calculated from a population of 3D structures of H1-hESC genomes.
- Distributions of SAF values for chromatin in different SPIN states calculated from a population of 3D structures of H1-hESC genomes.
- (Top left panel) Schematic view of structural features in single cell models. RAD: radial position, LaD: Distance to the nuclear envelope, SpD: Distance to the closest speckle. (Remaining panels) Cumulative distributions from single cell structure features of POU3F1 gene in the simulated cell population for HFFc6 and H1 h-ESC cells (SpD: speckle distance, ICP: inter-chromosomal contact probability, transAB ratio).
- (Top left panel) Gene expression levels of CAV1 in H1-hESC and HFFc6 cells. (Top right panel) distribution of joint speckle distance and lamina distance for CAV1 genes in 1000 single cell models. (Lower panels) log-fold enrichment of 14 structure features for CAV1 gene in H1ESC and HFFc6 cells.

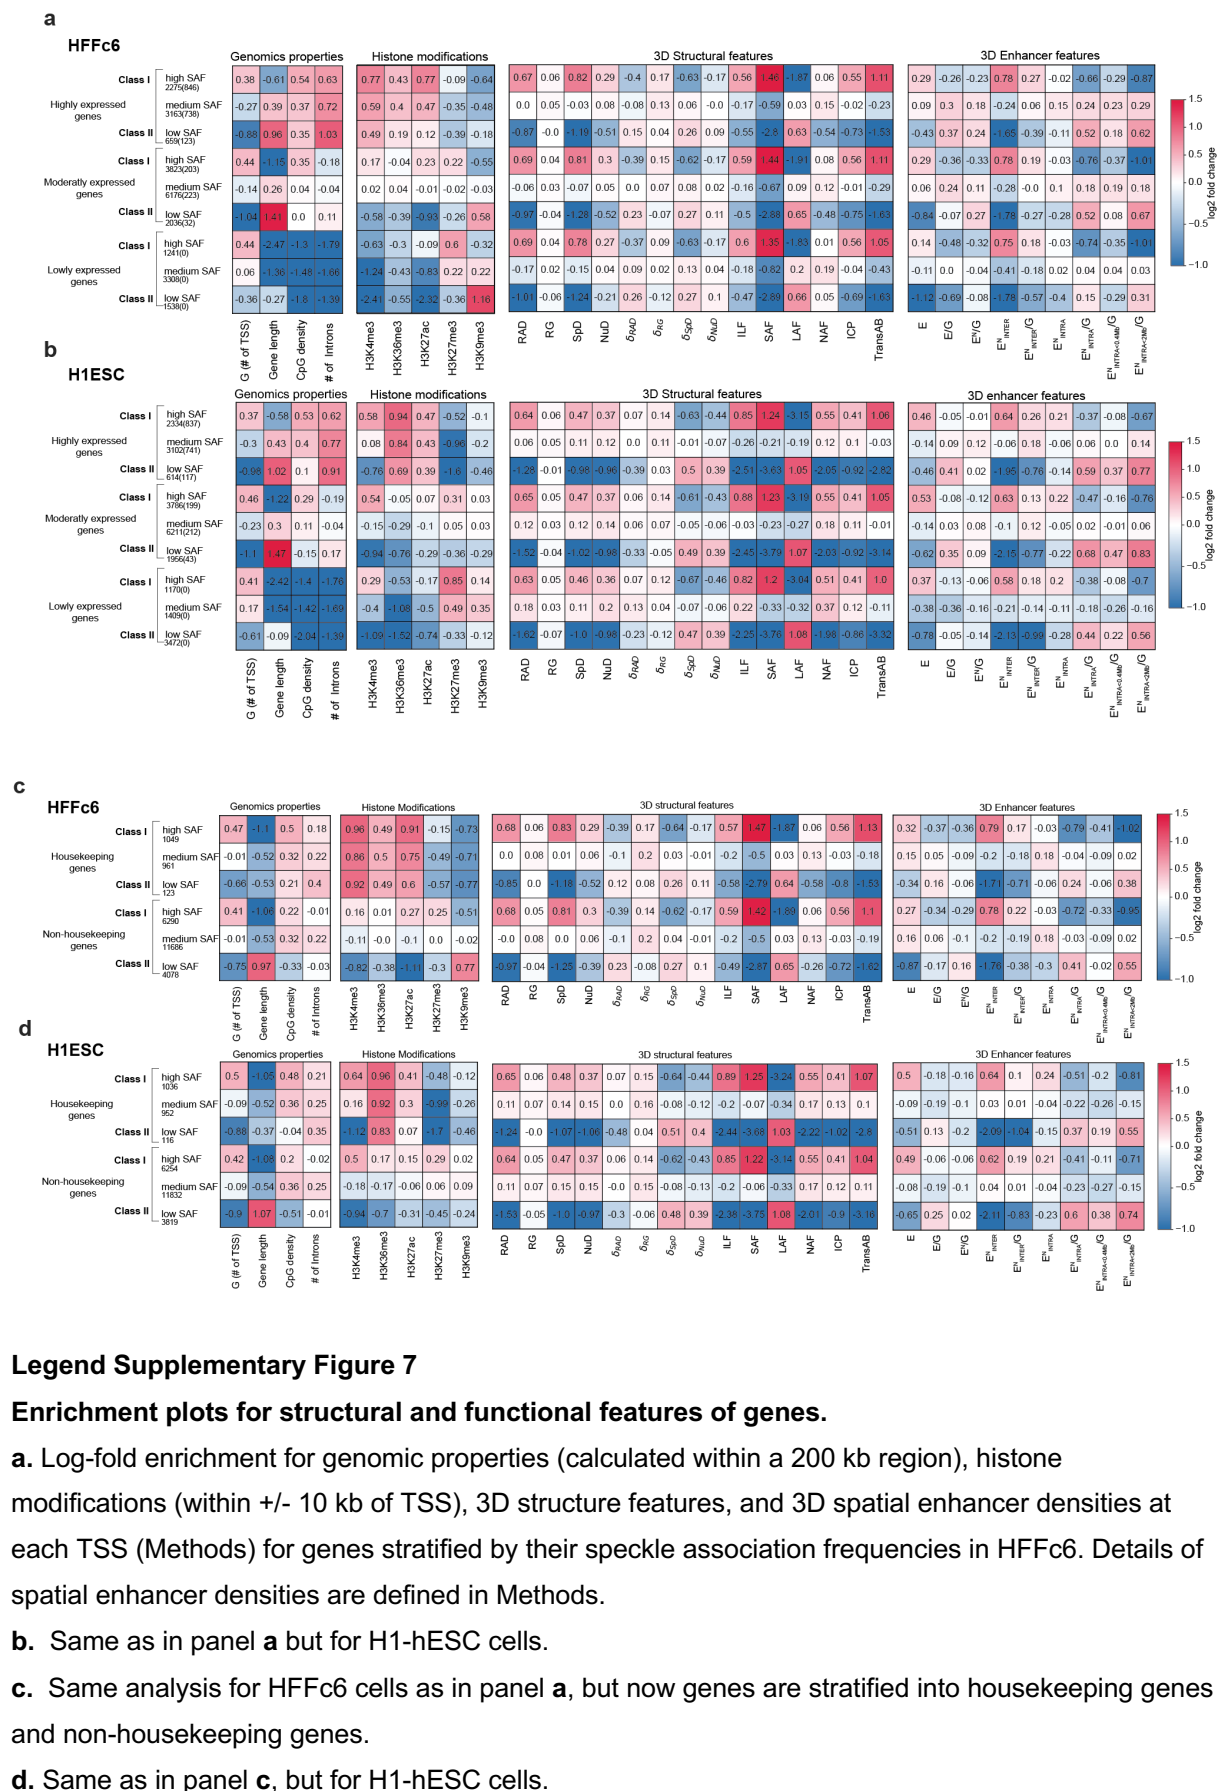



Supplementary Figure 8

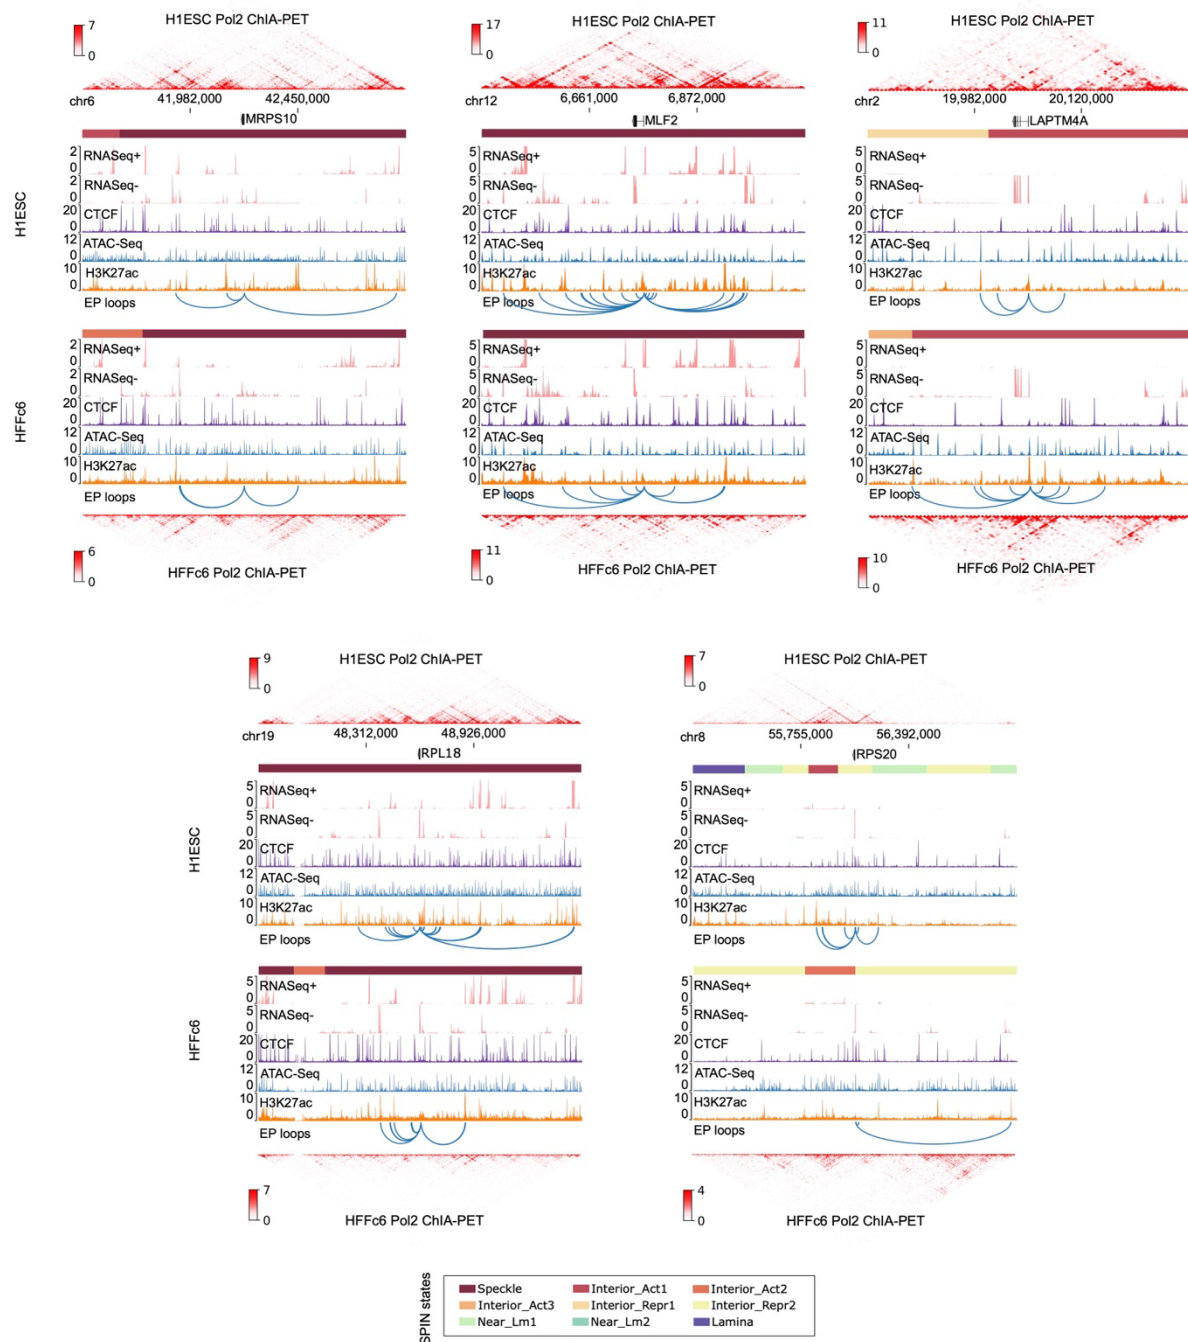

Legend Supplementary Figure 8

Example genome browser views showing cell-type-specific enhancer–promoter interactions of housekeeping genes.

Blue arcs represent chromatin loops linking the promoters of the indicated housekeeping genes to distal enhancers.



## Supplementalry Figure 9

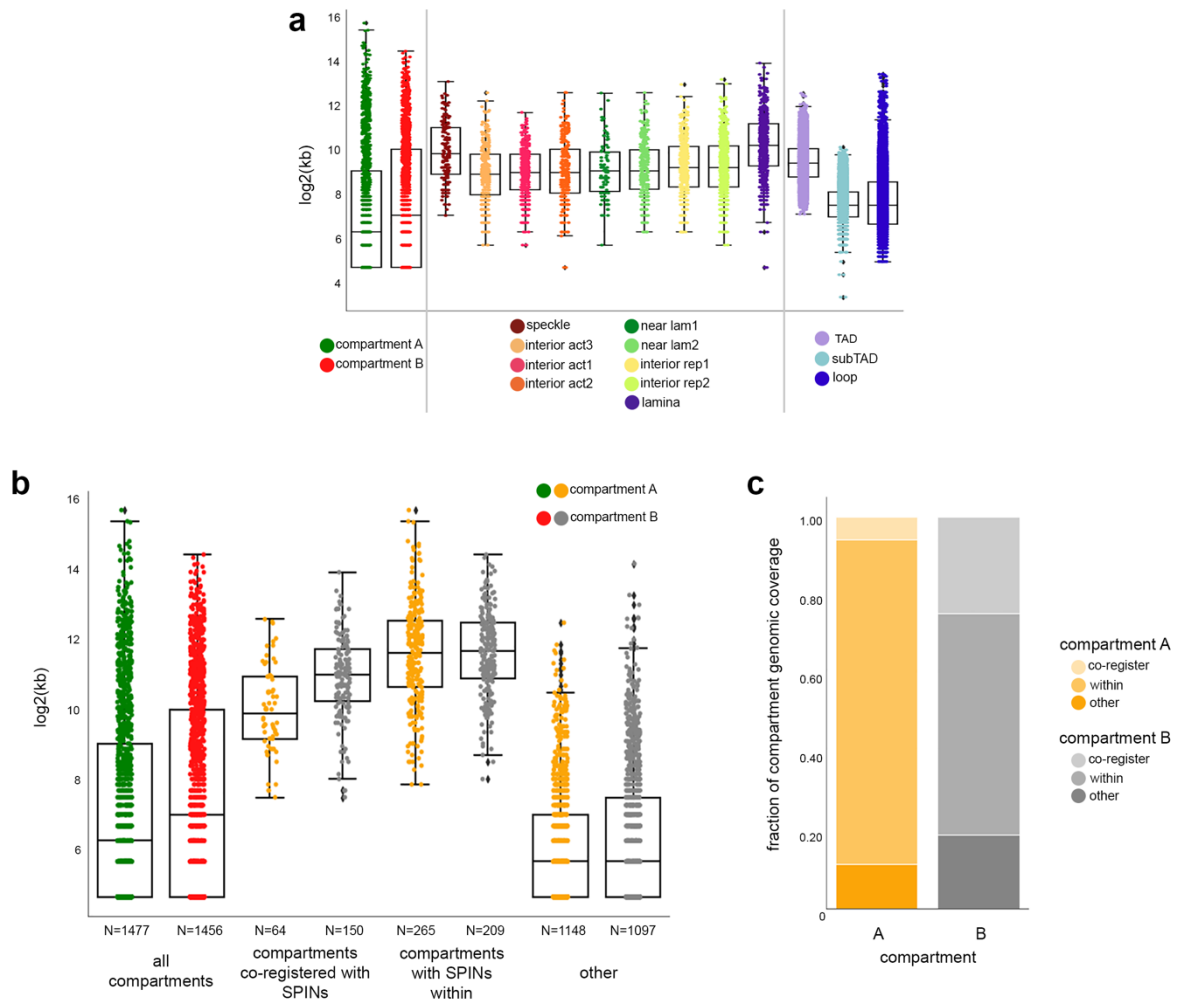

### Legend Supplementary Figure 9

#### Compartments and SPIN comparison.

**a.** Size comparison of genome folding features in H1-hESCs. All regions plotted by size of their genomic coordinates, box plot shows 25th, 50th, and 75th quartiles, whiskers show minimum and maximum values with outliers annotated.

**b.** Genomic size of A/B compartments stratified by SPIN alignment in H1-hESCs. Total compartment A (green; N=1477) and total compartment B (red ; N=1456) were stratified by those that co-register with a SPIN, fully encompass or contain a SPIN within, or other, including nested within a SPIN and no SPIN intersection. **c.**

Genomic coverage of A/B compartments stratified by SPIN alignment.

Supplementary Figure 10

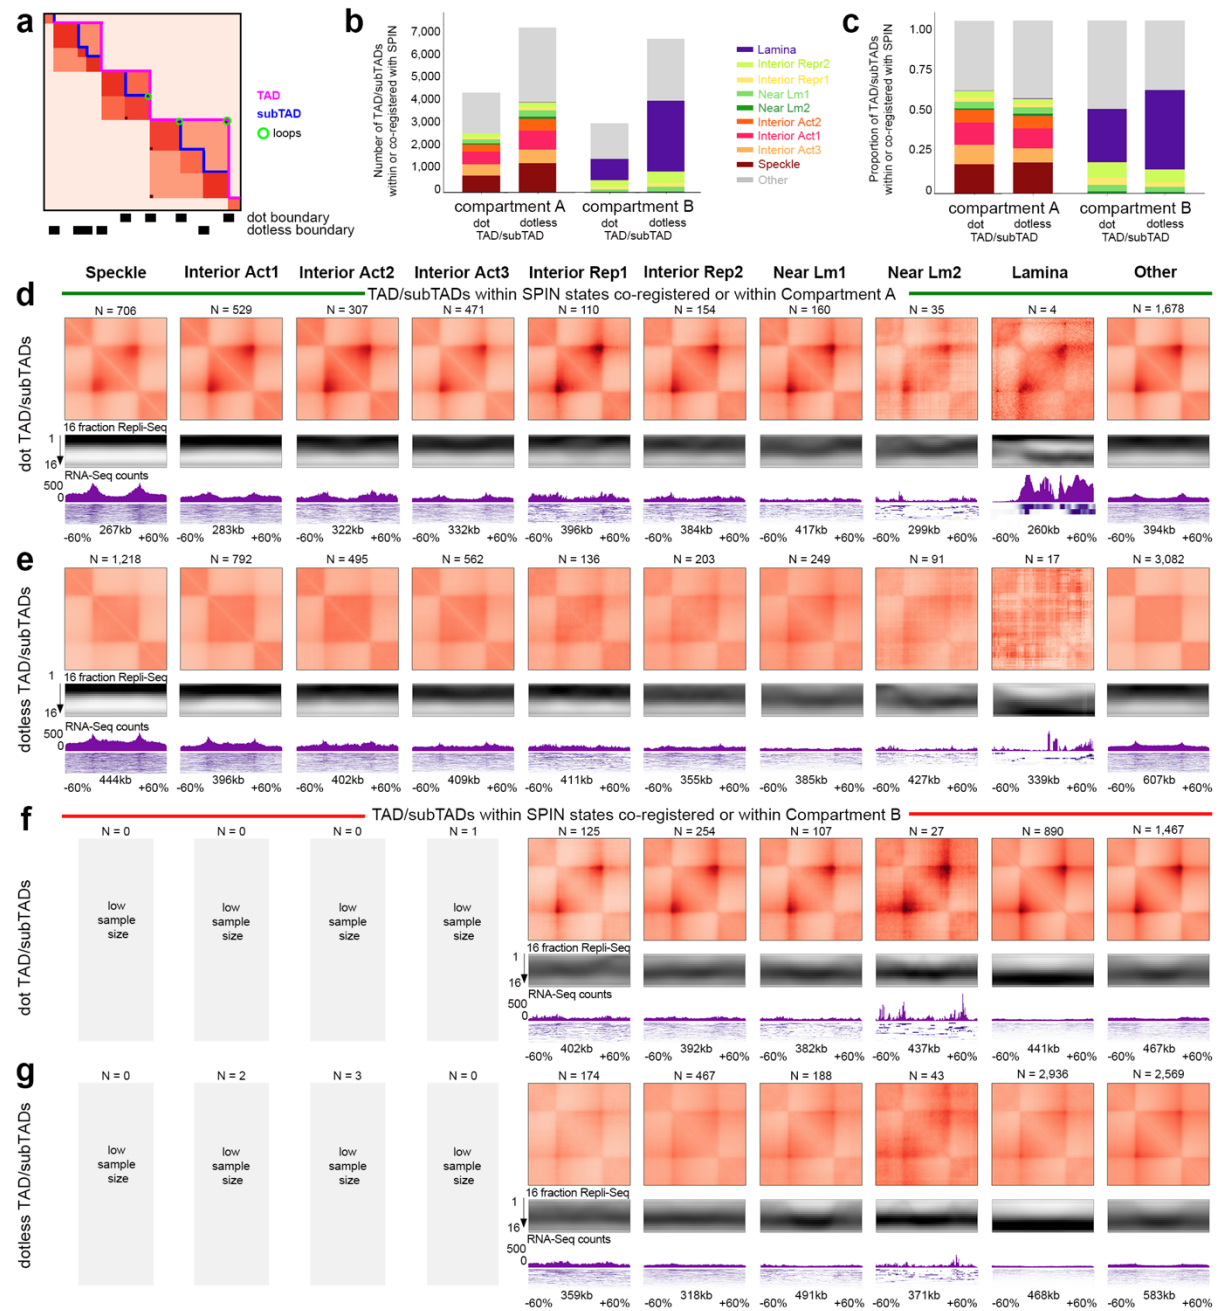

Legend Supplementary Figure 10

Compartment, SPIN, and TAD integration with replication timing, RNA-seq, and nascent transcripts from iMargi.

**a.** Schematic depicting TAD (pink) and subTADs (blue) domains and loops (green circle). Dot domains contain a loop at the domain apex and dot boundaries. Dotless domains do not contain a loop at the apex and thus only dotless boundaries.

**b.,c.** Dot and dotless TAD/subTAD domains that are within or co- register with a SPIN state contained within or co-registering with A/B compartments. **b.** Number of and **c.** proportion of SPINs stratified by A/B compartment and presence of corner-dot TAD/subTAD domains.

**d.-g.** Averaged Hi-C, replication timing (16 fraction Repli-seq), mRNA levels (RNA-seq) for H1-hESCs at dot and dotless TAD/subTAD domains co-registered or co- localized within all SPIN states (columns 1-9) and TAD/subTAD domains with other SPIN alignment (column 10) either co-registered or co-localized within A/B compartments. All genomics data is plotted as the average signal across all genomic intervals representing domains in a particular column. TAD/subTAD genomic intervals of (TAD/subTAD genomic interval +/- flanks of 60% of the size of the genomic interval) are stretched laterally to scale by size before average signal is computed. **d.** Dot and **e.** dotless TAD/subTAD domain co- registered or within a SPIN and co-registered or within compartment A and **f.** Dot and **g.** dotless TAD/subTAD domain co-registered or within a SPIN and co-registered or within compartment B. Tracks show pileups in H1-hESC for Hi-C Aggregate-Peak-Analysis (APA), 16 fraction Repli-seq, median RNA-seq signal, condensed RNA-seq reads.

Supplementary Figure 11

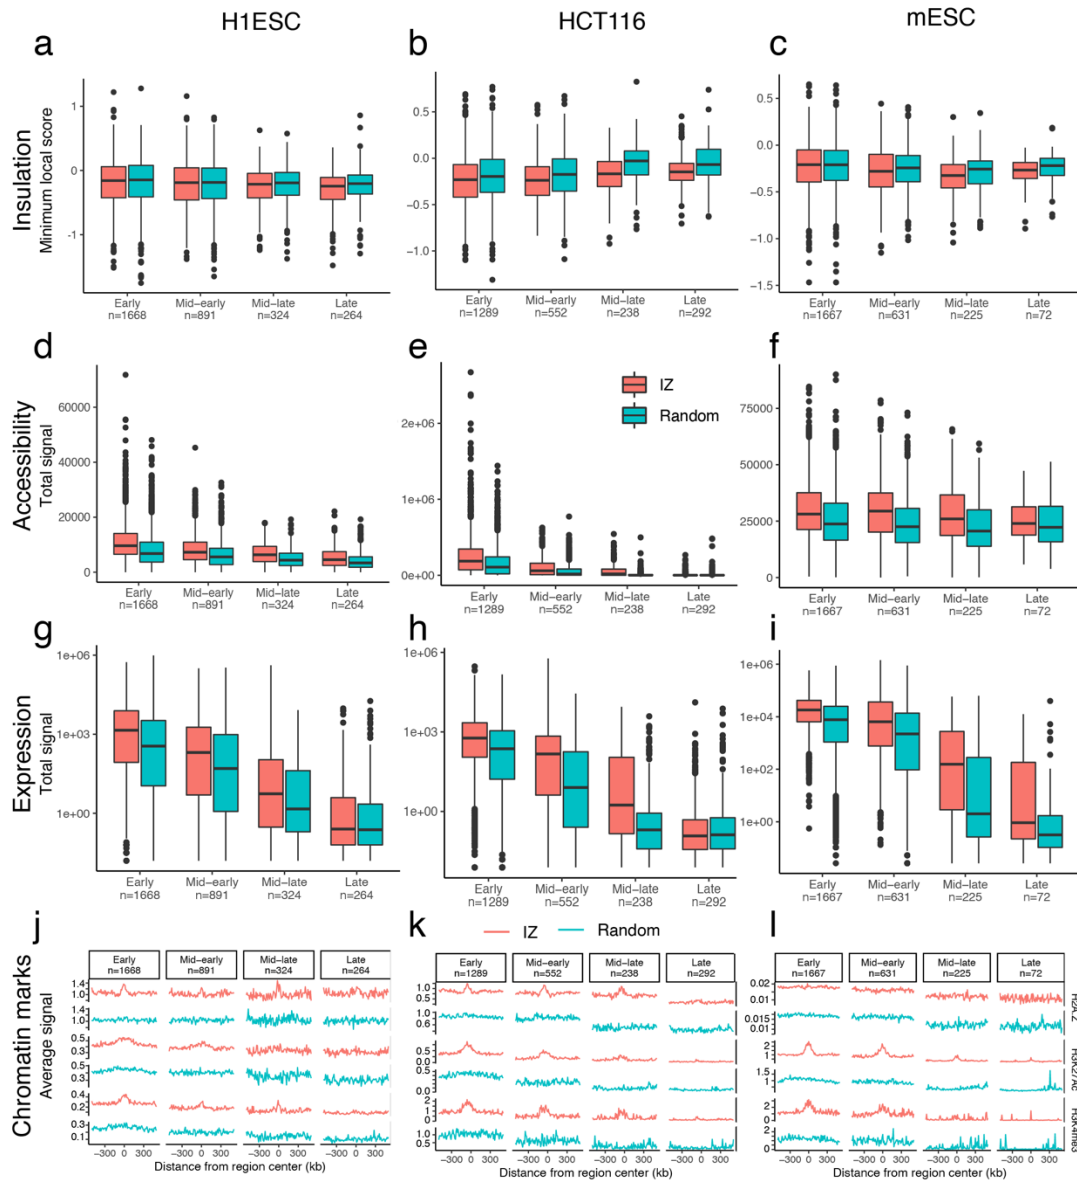

### Legend Supplementary Figure 11

#### Comparison of IZ properties across cell lines.

**a.-c.** Boxplots showing the minimum diamond insulation score at IZs in H1-hESC (a), HCT116 (b) and mESC (c).

**d.-f.** Boxplots showing the total chromatin accessibility at IZs in H1-hESC (d), HCT116 (e), and mESC (f).

**g.-i.** Boxplots showing the total RNA signal in H1-hESC (g), HCT116 (h), and mESC (i).

**j.-l.** Average histone marks signal in 1Mb regions centered on IZs in H1-hESC (j), HCT116 (k), and mESC (l).

Boxplots represent the median and interquartile range (IQR); whiskers mark 1.5x the IQR; data beyond 1.5x the IQR are plotted as individual points.

# Supplementary Figure 12

a

| Application                | general nuclear organization (chromosome, compartment level), in cell lines and cultured cells | general nuclear organization in small cell populations, up to tens of thousands of cells | Analysis in single cells | analysis of mixed samples, e.g., complex tissues | Genome rearrangement analysis | Sub kb-resolution analysis | detection of looping interactions between cCREs genome-wide | detection of looping interactions between cCREs in specific loci of up to several Mb |
|----------------------------|------------------------------------------------------------------------------------------------|------------------------------------------------------------------------------------------|--------------------------|--------------------------------------------------|-------------------------------|----------------------------|-------------------------------------------------------------|--------------------------------------------------------------------------------------|
| <b>Assay</b>               |                                                                                                |                                                                                          |                          |                                                  |                               |                            |                                                             |                                                                                      |
| Hi-C                       | ***                                                                                            | **                                                                                       | ..                       | *                                                | ***                           | ***                        | **                                                          | ..                                                                                   |
| Micro-C                    | ***                                                                                            | *                                                                                        | ..                       | *                                                | ***                           | ***                        | **                                                          | ..                                                                                   |
| Chia-PET                   | *                                                                                              | *                                                                                        | ..                       | *                                                | *                             | **                         | ***                                                         | **                                                                                   |
| PLAC-seq / Hi-ChIP         | *                                                                                              | *                                                                                        | ..                       | *                                                | *                             | **                         | ***                                                         | **                                                                                   |
| GAM                        | ***                                                                                            | ***                                                                                      | ***                      | ***                                              | *                             | *                          | *                                                           | ..                                                                                   |
| Capture-Micro-C            | *                                                                                              | *                                                                                        | ..                       | *                                                | **                            | ***                        | ***                                                         | ***                                                                                  |
| Capture-C                  | *                                                                                              | *                                                                                        | ..                       | *                                                | **                            | ***                        | ***                                                         | ***                                                                                  |
| Single cell Hi-C           | **                                                                                             | ***                                                                                      | ***                      | ***                                              | *                             | *                          | *                                                           | ..                                                                                   |
| Single cell HiChip/ChiaPet | **                                                                                             | **                                                                                       | ***                      | ***                                              | *                             | *                          | *                                                           | ..                                                                                   |

b

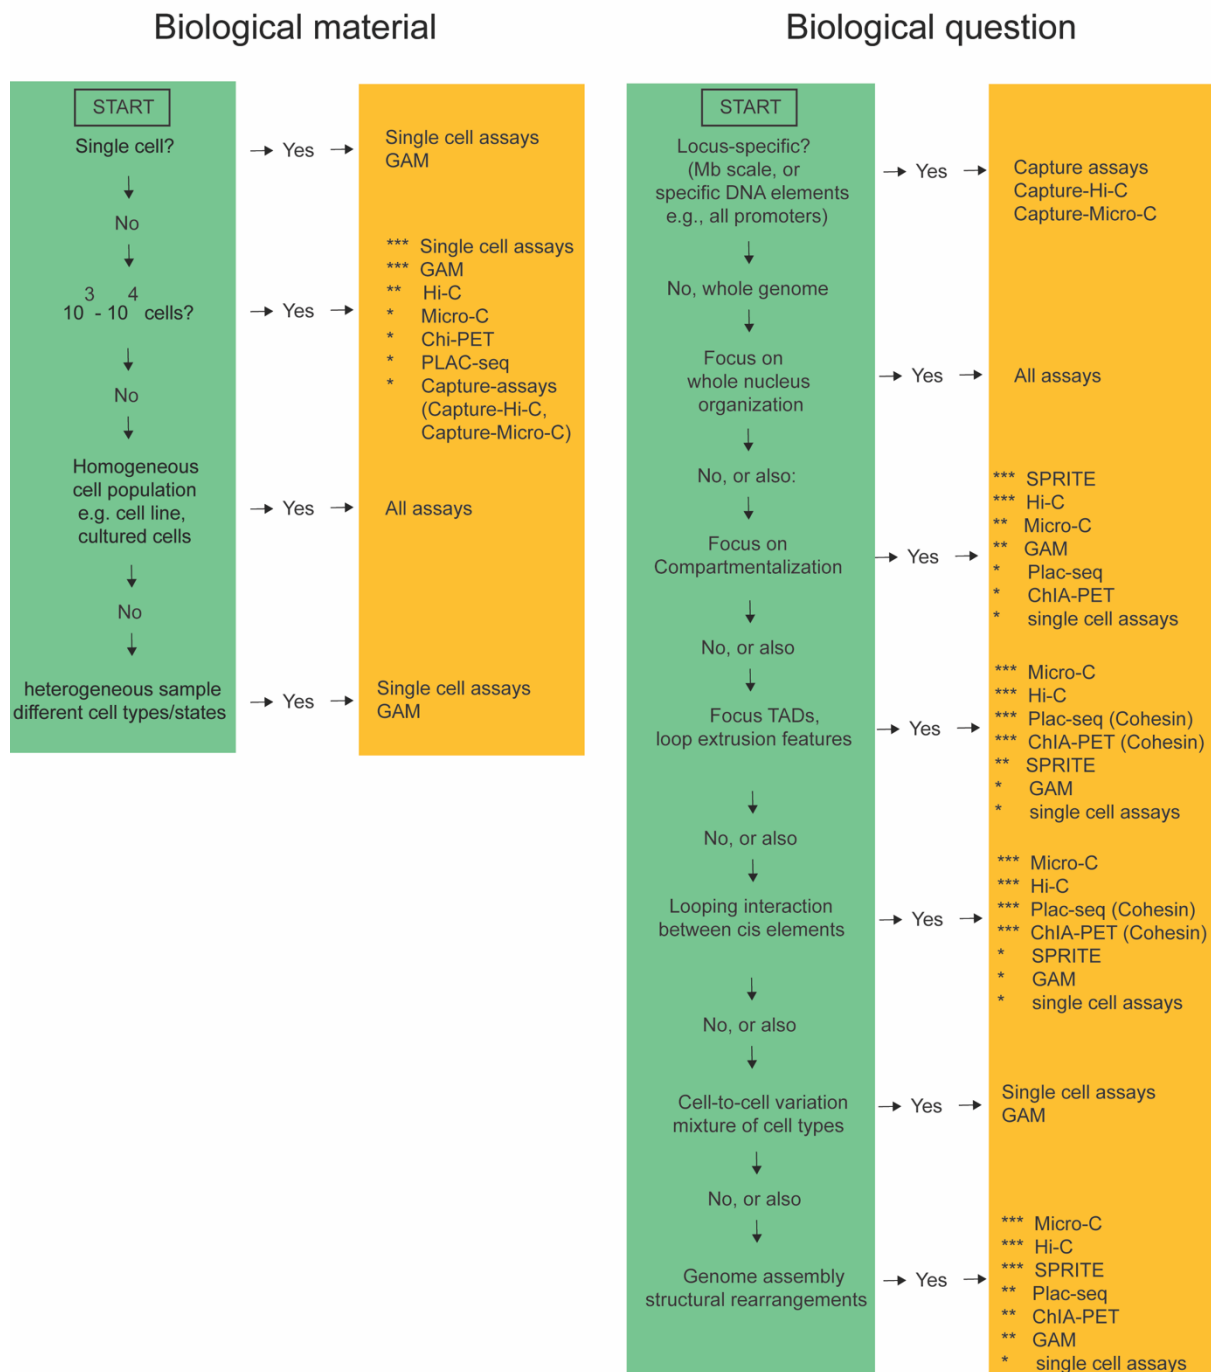

### Legend Supplementary Figure 12

#### User guide and decision trees for assay usage

- Table with recommendations for usage of indicated assays for indicated applications
- Decision trees for assay selection focused starting biological material (left), and biological question (right).

\*\*\*: well suited; \*\*: can be used; \*: less suited, -: not applicable.

Supplementary Figure 13

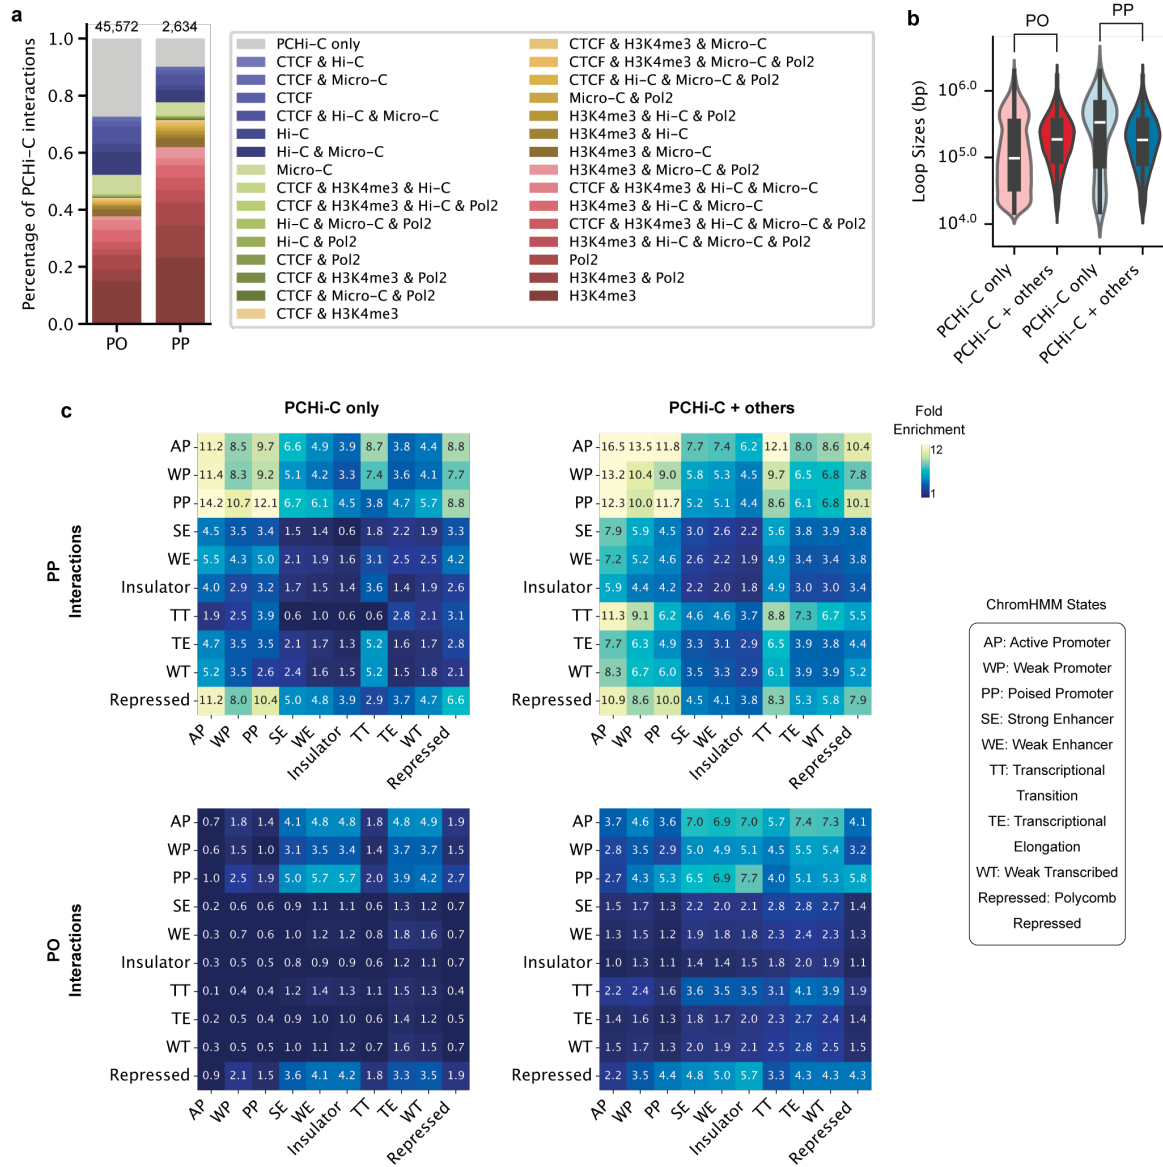

Legend Supplementary Figure 13

**Comparison of Promoter Capture Hi-C Interactions with Loops Identified by Other 3D Genomic Methods.** A published Promoter Capture Hi-C (PCHI-C) dataset in H1-hESC cells was used for this analysis [Jung, 2019 #2049]. Promoter-promoter (PP) and promoter-other (PO) interactions were analyzed separately.

**a.** Percentage of PP and PO PCHI-C interactions overlapping with loops identified by various combinations of other 3D genomic methods. The number on top of each bar indicates the total interaction number for each category.

**b.** Comparison of genomic distances between interacting anchors (i.e., loop sizes) for interactions unique to PCHi-C versus those also supported by other methods.

**c.** Fold-enrichment of ChromHMM states at loop anchors for interactions unique to PCHi-C or shared with other 3D genomic methods.



## Supplementary Note 1

### Publicly available datasets used in this study, organized by section of the paper

#### 1. Methods and data for benchmarking section

##### Datasets

| Cell Type | Experimental Type | Data Type              | Data Source/Download Link                                                                                                                                                                                                                                                         | Note           |
|-----------|-------------------|------------------------|-----------------------------------------------------------------------------------------------------------------------------------------------------------------------------------------------------------------------------------------------------------------------------------|----------------|
| H1-ESC    | Hi-C              | Contact matrix         | 4DN (4DNFI82R42AD)                                                                                                                                                                                                                                                                |                |
|           | Micro-C           | Contact matrix         | 4DN (4DNFI9GMP2J8)                                                                                                                                                                                                                                                                |                |
|           | CTCF ChIA-PET     | Contact matrix         | 4DN (4DNFINMHXGVQ)                                                                                                                                                                                                                                                                |                |
|           | RNAPII ChIA-PET   | Contact matrix         | 4DN (4DNFIO8YJ5JA)                                                                                                                                                                                                                                                                |                |
|           | H3K4me3 PLAC-Seq  | Contact matrix         | 4DN (4DNFICOGAKW2)                                                                                                                                                                                                                                                                |                |
|           | DNA SPRITE        | Contact matrix         | 4DN (4DNFITX6WCRT)                                                                                                                                                                                                                                                                |                |
|           |                   | Clusters               | 4DN (4DNFIV3PDS5F, 4DNFIY1TXUZ)                                                                                                                                                                                                                                                   |                |
|           | GAM               | Contact matrix at 25kb | 4DNESVAMUDHA                                                                                                                                                                                                                                                                      |                |
|           | CTCF ChIP-Seq     | Signal (Bigwig)        | <a href="https://epigenome.wustl.edu/epimap/data/observed/FINAL_CTCF_BSS00478.sub_VS_FINAL_WCE_BSS00478.pval.signal.bedgraph.gz.bigWig">https://epigenome.wustl.edu/epimap/data/observed/FINAL_CTCF_BSS00478.sub_VS_FINAL_WCE_BSS00478.pval.signal.bedgraph.gz.bigWig</a>         | ChromHMM Input |
|           | H3K27ac ChIP-Seq  | Signal (Bigwig)        | <a href="https://epigenome.wustl.edu/epimap/data/observed/FINAL_H3K27ac_BSS00478.sub_VS_FINAL_WCE_BSS00478.pval.signal.bedgraph.gz.bigWig">https://epigenome.wustl.edu/epimap/data/observed/FINAL_H3K27ac_BSS00478.sub_VS_FINAL_WCE_BSS00478.pval.signal.bedgraph.gz.bigWig</a>   |                |
|           | H3K27me3 ChIP-Seq | Signal (Bigwig)        | <a href="https://epigenome.wustl.edu/epimap/data/observed/FINAL_H3K27me3_BSS00478.sub_VS_FINAL_WCE_BSS00478.pval.signal.bedgraph.gz.bigWig">https://epigenome.wustl.edu/epimap/data/observed/FINAL_H3K27me3_BSS00478.sub_VS_FINAL_WCE_BSS00478.pval.signal.bedgraph.gz.bigWig</a> |                |
|           | H3K36me3 ChIP-Seq | Signal (Bigwig)        | <a href="https://epigenome.wustl.edu/epimap/data/observed/FINAL_H3K36me3_BSS00478.sub_VS_FINAL_WCE_BSS00478.pval.signal.bedgraph.gz.bigWig">https://epigenome.wustl.edu/epimap/data/observed/FINAL_H3K36me3_BSS00478.sub_VS_FINAL_WCE_BSS00478.pval.signal.bedgraph.gz.bigWig</a> |                |

|                   |                 |                                                                                                                                                                                                                                                                                   |                     |
|-------------------|-----------------|-----------------------------------------------------------------------------------------------------------------------------------------------------------------------------------------------------------------------------------------------------------------------------------|---------------------|
| H3K4me1 ChIP-Seq  | Signal (Bigwig) | <a href="https://epigenome.wustl.edu/epimap/data/observe/d/FINAL_H3K4me1_BSS00478.sub_VS_FINAL_WCE_BSS00478.pval.signal.bedgraph.gz.bigWig">https://epigenome.wustl.edu/epimap/data/observe/d/FINAL_H3K4me1_BSS00478.sub_VS_FINAL_WCE_BSS00478.pval.signal.bedgraph.gz.bigWig</a> |                     |
| H3K9ac ChIP-Seq   | Signal (Bigwig) | <a href="https://epigenome.wustl.edu/epimap/data/observe/d/FINAL_H3K9ac_BSS00478.sub_VS_FINAL_WCE_BSS00478.pval.signal.bedgraph.gz.bigWig">https://epigenome.wustl.edu/epimap/data/observe/d/FINAL_H3K9ac_BSS00478.sub_VS_FINAL_WCE_BSS00478.pval.signal.bedgraph.gz.bigWig</a>   |                     |
| H3K4me3 ChIP-Seq  | Signal (Bigwig) | <a href="https://epigenome.wustl.edu/epimap/data/observe/d/FINAL_H3K4me3_BSS00478.sub_VS_FINAL_WCE_BSS00478.pval.signal.bedgraph.gz.bigWig">https://epigenome.wustl.edu/epimap/data/observe/d/FINAL_H3K4me3_BSS00478.sub_VS_FINAL_WCE_BSS00478.pval.signal.bedgraph.gz.bigWig</a> |                     |
| H3K4me2 ChIP-Seq  | Signal (Bigwig) | <a href="https://epigenome.wustl.edu/epimap/data/observe/d/FINAL_H3K4me2_BSS00478.sub_VS_FINAL_WCE_BSS00478.pval.signal.bedgraph.gz.bigWig">https://epigenome.wustl.edu/epimap/data/observe/d/FINAL_H3K4me2_BSS00478.sub_VS_FINAL_WCE_BSS00478.pval.signal.bedgraph.gz.bigWig</a> |                     |
| RNA-Seq           | Signal (Bigwig) | ENCODE (ENCFF501KFP, ENCFF563OKS)                                                                                                                                                                                                                                                 | Visualization       |
| CTCF ChIP-Seq     | Signal (Bigwig) | ENCODE (ENCFF332TNJ)                                                                                                                                                                                                                                                              | Enrichment analysis |
| H3K27ac ChIP-Seq  | Signal (Bigwig) | ENCODE (ENCFF103PND)                                                                                                                                                                                                                                                              |                     |
| H3K27me3 ChIP-Seq | Signal (Bigwig) | ENCODE (ENCFF502GXT)                                                                                                                                                                                                                                                              |                     |
| EZH2 ChIP-Seq     | Signal (Bigwig) | ENCODE (ENCFF109KCQ)                                                                                                                                                                                                                                                              |                     |
| POLR2A ChIP-Seq   | Signal (Bigwig) | ENCODE (ENCFF942TZX)                                                                                                                                                                                                                                                              |                     |
| CHD1 ChIP-Seq     | Signal (Bigwig) | ENCODE (ENCFF597VKW)                                                                                                                                                                                                                                                              |                     |
| KDM4A ChIP-Seq    | Signal (Bigwig) | ENCODE (ENCFF269CHA)                                                                                                                                                                                                                                                              |                     |
| PHF8 ChIP-Seq     | Signal (Bigwig) | ENCODE (ENCFF059EBB)                                                                                                                                                                                                                                                              |                     |
| TAF1 ChIP-Seq     | Signal (Bigwig) | ENCODE (ENCFF837BSZ)                                                                                                                                                                                                                                                              |                     |
| RAD21 ChIP-Seq    | Signal (Bigwig) | ENCODE (ENCFF056GWP)                                                                                                                                                                                                                                                              |                     |
| KDM1A ChIP-Seq    | Peaks           | ENCODE (ENCFF759CSN)                                                                                                                                                                                                                                                              |                     |
| CBX8 ChIP-Seq     | Peaks           | ENCODE (ENCFF483UZG)                                                                                                                                                                                                                                                              | Enrichment analysis |
| EZH2 ChIP-Seq     | Peaks           | ENCODE (ENCFF414CAB)                                                                                                                                                                                                                                                              |                     |
| KDM4A ChIP-Seq    | Peaks           | ENCODE (ENCFF021QGZ)                                                                                                                                                                                                                                                              |                     |
| SP4 ChIP-Seq      | Peaks           | ENCODE (ENCFF257FUV)                                                                                                                                                                                                                                                              |                     |
| MAX ChIP-Seq      | Peaks           | ENCODE (ENCFF994IHO)                                                                                                                                                                                                                                                              |                     |
| POU5F1 ChIP-Seq   | Peaks           | ENCODE (ENCFF383EYO)                                                                                                                                                                                                                                                              |                     |
| CHD1 ChIP-Seq     | Peaks           | ENCODE (ENCFF731EYW)                                                                                                                                                                                                                                                              |                     |
| ZNF143 ChIP-Seq   | Peaks           | ENCODE (ENCFF235ROG)                                                                                                                                                                                                                                                              |                     |
| TAF1 ChIP-Seq     | Peaks           | ENCODE (ENCFF886BPR)                                                                                                                                                                                                                                                              | Enrichment analysis |
| TCF12 ChIP-Seq    | Peaks           | ENCODE (ENCFF959HJP)                                                                                                                                                                                                                                                              |                     |

|                             |       |                      |
|-----------------------------|-------|----------------------|
| CHD7 ChIP-Seq               | Peaks | ENCODE (ENCFF338IDU) |
| CEBPB ChIP-Seq              | Peaks | ENCODE (ENCFF823KCM) |
| BRCA1 ChIP-Seq              | Peaks | ENCODE (ENCFF721TNS) |
| MXI1 ChIP-Seq               | Peaks | ENCODE (ENCFF727RNJ) |
| CTBP2 ChIP-Seq              | Peaks | ENCODE (ENCFF501VJW) |
| SIRT6 ChIP-Seq              | Peaks | ENCODE (ENCFF219XEX) |
| SUZ12 ChIP-Seq              | Peaks | ENCODE (ENCFF225AMM) |
| EP300 ChIP-Seq              | Peaks | ENCODE (ENCFF244VKF) |
| ZNF274 ChIP-Seq             | Peaks | ENCODE (ENCFF718OGI) |
| HDAC6 ChIP-Seq              | Peaks | ENCODE (ENCFF802HUU) |
| GABPA ChIP-Seq              | Peaks | ENCODE (ENCFF308NZT) |
| POLR2A ChIP-Seq             | Peaks | ENCODE (ENCFF322DAE) |
| GTF2F1 ChIP-Seq             | Peaks | ENCODE (ENCFF138MYA) |
| MYC ChIP-Seq                | Peaks | ENCODE (ENCFF049SMR) |
| NRF1 ChIP-Seq               | Peaks | ENCODE (ENCFF414RES) |
| REST ChIP-Seq               | Peaks | ENCODE (ENCFF738LQB) |
| JUN ChIP-Seq                | Peaks | ENCODE (ENCFF821GUI) |
| HDAC2 ChIP-Seq              | Peaks | ENCODE (ENCFF923TXH) |
| RXRA ChIP-Seq               | Peaks | ENCODE (ENCFF745EBL) |
| CTCF ChIP-Seq               | Peaks | ENCODE (ENCFF023LAA) |
| YY1 ChIP-Seq                | Peaks | ENCODE (ENCFF376FVJ) |
| ATF3 ChIP-Seq               | Peaks | ENCODE (ENCFF440FTA) |
| USF2 ChIP-Seq               | Peaks | ENCODE (ENCFF346KIW) |
| BCL11A ChIP-Seq             | Peaks | ENCODE (ENCFF847HXU) |
| JUND ChIP-Seq               | Peaks | ENCODE (ENCFF287KKY) |
| USF1 ChIP-Seq               | Peaks | ENCODE (ENCFF978MNS) |
| RNF2 ChIP-Seq               | Peaks | ENCODE (ENCFF241UKW) |
| SP2 ChIP-Seq                | Peaks | ENCODE (ENCFF309QRC) |
| SIX5 ChIP-Seq               | Peaks | ENCODE (ENCFF384KWP) |
| CBX5 ChIP-Seq               | Peaks | ENCODE (ENCFF218OXB) |
| ATF2 ChIP-Seq               | Peaks | ENCODE (ENCFF352KLD) |
| RFX5 ChIP-Seq               | Peaks | ENCODE (ENCFF142NQQ) |
| FOSL1 ChIP-Seq              | Peaks | ENCODE (ENCFF428RHR) |
| NANOG ChIP-Seq              | Peaks | ENCODE (ENCFF435DTC) |
| POLR2AphosphoS5<br>ChIP-Seq | Peaks | ENCODE (ENCFF872MKT) |
| BACH1 ChIP-Seq              | Peaks | ENCODE (ENCFF749UPP) |
| E2F6 ChIP-Seq               | Peaks | ENCODE (ENCFF174AVU) |
| CHD2 ChIP-Seq               | Peaks | ENCODE (ENCFF726GBF) |
| RAD21 ChIP-Seq              | Peaks | ENCODE (ENCFF883FUW) |
| SRF ChIP-Seq                | Peaks | ENCODE (ENCFF648QJE) |
| EGR1 ChIP-Seq               | Peaks | ENCODE (ENCFF100KKH) |
| TEAD4 ChIP-Seq              | Peaks | ENCODE (ENCFF885PQR) |
| TBP ChIP-Seq                | Peaks | ENCODE (ENCFF817TGF) |

|       |                   |                 |                                                                                                                                                                                                                                                                                   |                |
|-------|-------------------|-----------------|-----------------------------------------------------------------------------------------------------------------------------------------------------------------------------------------------------------------------------------------------------------------------------------|----------------|
| HFFc6 | CREB1 ChIP-Seq    | Peaks           | ENCODE (ENCFF978KGB)                                                                                                                                                                                                                                                              |                |
|       | MAFK ChIP-Seq     | Peaks           | ENCODE (ENCFF710YJK)                                                                                                                                                                                                                                                              |                |
|       | RBBP5 ChIP-Seq    | Peaks           | ENCODE (ENCFF610PCN)                                                                                                                                                                                                                                                              |                |
|       | SIN3A ChIP-Seq    | Peaks           | ENCODE (ENCFF432EYM)                                                                                                                                                                                                                                                              |                |
|       | SP1 ChIP-Seq      | Peaks           | ENCODE (ENCFF284JVS)                                                                                                                                                                                                                                                              |                |
|       | SAP30 ChIP-Seq    | Peaks           | ENCODE (ENCFF043HXQ)                                                                                                                                                                                                                                                              |                |
|       | KDM5A ChIP-Seq    | Peaks           | ENCODE (ENCFF471OCM)                                                                                                                                                                                                                                                              |                |
|       | ASH2L ChIP-Seq    | Peaks           | ENCODE (ENCFF693FGQ)                                                                                                                                                                                                                                                              |                |
|       | Hi-C              | Contact matrix  | 4DN (4DNFI9VXXO55)                                                                                                                                                                                                                                                                |                |
|       | Micro-C           | Contact matrix  | 4DN (4DNFI9FVHJZQ)                                                                                                                                                                                                                                                                |                |
|       | CTCF ChIA-PET     | Contact matrix  | 4DN (4DNFIG2ILS39)                                                                                                                                                                                                                                                                |                |
|       | RNAPII ChIA-PET   | Contact matrix  | 4DN (4DNFI9REIU8H)                                                                                                                                                                                                                                                                |                |
|       | H3K4me3 PLAC-Seq  | Contact matrix  | 4DN (4DNFI9REIU8H)                                                                                                                                                                                                                                                                |                |
|       | DNA SPRITE        | Contact matrix  | 4DN (4DNFIP9HGF9M)                                                                                                                                                                                                                                                                |                |
|       |                   | Clusters        | 4DN (4DNFIRXON7Z2)                                                                                                                                                                                                                                                                |                |
|       | CTCF ChIP-Seq     | Signal (Bigwig) | <a href="https://epigenome.wustl.edu/epimap/data/observed/FINAL_CTCF_BSS00353.sub_VS_FINAL_WCE_BSS00353.pval.signal.bedgraph.gz.bigWig">https://epigenome.wustl.edu/epimap/data/observed/FINAL_CTCF_BSS00353.sub_VS_FINAL_WCE_BSS00353.pval.signal.bedgraph.gz.bigWig</a>         | ChromHMM Input |
|       | H3K27ac ChIP-Seq  | Signal (Bigwig) | <a href="https://epigenome.wustl.edu/epimap/data/observed/FINAL_H3K27ac_BSS00353.sub_VS_FINAL_WCE_BSS00353.pval.signal.bedgraph.gz.bigWig">https://epigenome.wustl.edu/epimap/data/observed/FINAL_H3K27ac_BSS00353.sub_VS_FINAL_WCE_BSS00353.pval.signal.bedgraph.gz.bigWig</a>   |                |
|       | H3K27me3 ChIP-Seq | Signal (Bigwig) | <a href="https://epigenome.wustl.edu/epimap/data/observed/FINAL_H3K27me3_BSS00353.sub_VS_FINAL_WCE_BSS00353.pval.signal.bedgraph.gz.bigWig">https://epigenome.wustl.edu/epimap/data/observed/FINAL_H3K27me3_BSS00353.sub_VS_FINAL_WCE_BSS00353.pval.signal.bedgraph.gz.bigWig</a> |                |
|       | H3K36me3 ChIP-Seq | Signal (Bigwig) | <a href="https://epigenome.wustl.edu/epimap/data/observed/FINAL_H3K36me3_BSS00353.sub_VS_FINAL_WCE_BSS00353.pval.signal.bedgraph.gz.bigWig">https://epigenome.wustl.edu/epimap/data/observed/FINAL_H3K36me3_BSS00353.sub_VS_FINAL_WCE_BSS00353.pval.signal.bedgraph.gz.bigWig</a> |                |
|       | H3K4me1 ChIP-Seq  | Signal (Bigwig) | <a href="https://epigenome.wustl.edu/epimap/data/observed/FINAL_H3K4me1_BSS00353.sub_VS_FINAL_WCE_BSS00353.pval.signal.bedgraph.gz.bigWig">https://epigenome.wustl.edu/epimap/data/observed/FINAL_H3K4me1_BSS00353.sub_VS_FINAL_WCE_BSS00353.pval.signal.bedgraph.gz.bigWig</a>   |                |
|       | H3K9ac ChIP-Seq   | Signal (Bigwig) | <a href="https://epigenome.wustl.edu/epimap/data/imputed/impute_BSS00353_H3K9ac.bigWig">https://epigenome.wustl.edu/epimap/data/imputed/impute_BSS00353_H3K9ac.bigWig</a>                                                                                                         |                |

|                  |                 |                                                                                                                                                                                                                                                                                 |
|------------------|-----------------|---------------------------------------------------------------------------------------------------------------------------------------------------------------------------------------------------------------------------------------------------------------------------------|
| H3K4me3 ChIP-Seq | Signal (Bigwig) | <a href="https://epigenome.wustl.edu/epimap/data/observed/FINAL_H3K4me3_BSS00353.sub_VS_FINAL_WCE_BSS00353.pval.signal.bedgraph.gz.bigWig">https://epigenome.wustl.edu/epimap/data/observed/FINAL_H3K4me3_BSS00353.sub_VS_FINAL_WCE_BSS00353.pval.signal.bedgraph.gz.bigWig</a> |
|------------------|-----------------|---------------------------------------------------------------------------------------------------------------------------------------------------------------------------------------------------------------------------------------------------------------------------------|

|                  |                 |                                                                                                                                                                             |
|------------------|-----------------|-----------------------------------------------------------------------------------------------------------------------------------------------------------------------------|
| H3K4me2 ChIP-Seq | Signal (Bigwig) | <a href="https://epigenome.wustl.edu/epimap/data/imputed/impute_BSS00353_H3K4me2.bigWig">https://epigenome.wustl.edu/epimap/data/imputed/impute_BSS00353_H3K4me2.bigWig</a> |
|------------------|-----------------|-----------------------------------------------------------------------------------------------------------------------------------------------------------------------------|

**GAM 4DN accession number:** 4DNESVAMUDHA (replicates id 4DNBS46FF9D9, 4DNBSB45FJC1)

**Software:** bowtie2 (v.2.3.4.3), samtools (v.1.14), bedtools (v.2.30), fastq\_screen (v.0.14.0), GEM-tools(v.1.315)

### Data processing - Hi-C, Micro-C, ChIA-PET, PLAC-Seq and SPRITE

The link for Hi-C, Micro-C and ChIA-PET files can be found here:

[https://data.4dnucleome.org/browse/?type=ExperimentSetReplicate&experimentset\\_type=replicate&experiments\\_in\\_set.biosample.biosource.organism.name=human&experiments\\_in\\_set.biosample.biosource\\_summary=HFFc6+%28Tier+1%29&experiments\\_in\\_set.biosample.biosource\\_summary=H1-hESC+%28Tier+1%29&experiments\\_in\\_set.experiment\\_categorizer.combined=Target%3A+RNA+Pol+II&experiments\\_in\\_set.experiment\\_categorizer.combined=Target%3A+CTCF+protein&experiments\\_in\\_set.experiment\\_categorizer.combined=Enzyme%3A+DpnII&experiments\\_in\\_set.experiment\\_categorizer.combined=Enzyme%3A+MNase&experiments\\_in\\_set.experiment\\_type.display\\_title=in+situ+Hi-C&experiments\\_in\\_set.experiment\\_type.display\\_title=DNA+SPRITE&experiments\\_in\\_set.experiment\\_type.display\\_title=Micro-C&experiments\\_in\\_set.experiment\\_type.display\\_title=PLAC-seq&experiments\\_in\\_set.experiment\\_type.display\\_title=in+situ+ChIA-PET](https://data.4dnucleome.org/browse/?type=ExperimentSetReplicate&experimentset_type=replicate&experiments_in_set.biosample.biosource.organism.name=human&experiments_in_set.biosample.biosource_summary=HFFc6+%28Tier+1%29&experiments_in_set.biosample.biosource_summary=H1-hESC+%28Tier+1%29&experiments_in_set.experiment_categorizer.combined=Target%3A+RNA+Pol+II&experiments_in_set.experiment_categorizer.combined=Target%3A+CTCF+protein&experiments_in_set.experiment_categorizer.combined=Enzyme%3A+DpnII&experiments_in_set.experiment_categorizer.combined=Enzyme%3A+MNase&experiments_in_set.experiment_type.display_title=in+situ+Hi-C&experiments_in_set.experiment_type.display_title=DNA+SPRITE&experiments_in_set.experiment_type.display_title=Micro-C&experiments_in_set.experiment_type.display_title=PLAC-seq&experiments_in_set.experiment_type.display_title=in+situ+ChIA-PET).

Link for PLAC-Seq and SPRITE files can be found here:

[https://data.4dnucleome.org/browse/?type=ExperimentSetReplicate&experimentset\\_type=replicate&experiments\\_in\\_set.biosample.biosource.organism.name=human&experiments\\_in\\_set.biosample.biosource\\_summary=H1-hESC+%28Tier+1%29&experiments\\_in\\_set.biosample.biosource\\_summary=HFFc6+%28Tier+1%29&experiments\\_in\\_set.experiment\\_type.display\\_title=DNA+SPRITE&experiments\\_in\\_set.experiment\\_type.display\\_title=PLAC-seq](https://data.4dnucleome.org/browse/?type=ExperimentSetReplicate&experimentset_type=replicate&experiments_in_set.biosample.biosource.organism.name=human&experiments_in_set.biosample.biosource_summary=H1-hESC+%28Tier+1%29&experiments_in_set.biosample.biosource_summary=HFFc6+%28Tier+1%29&experiments_in_set.experiment_type.display_title=DNA+SPRITE&experiments_in_set.experiment_type.display_title=PLAC-seq).

GAM H1-hESC was also downloaded from 4DN Data Portal and can be found here: <https://data.4dnucleome.org/search/?q=GAM+H1-hESC&type=Item> . No additional processing was applied to GAM data.

## Preferential Interactions

Bigwig or bedgraph files for LMNB1 DamID, TSA-Seq and Repli-Seq were downloaded from DCIC Data Portal. The link for those files can be found here :

[https://data.4dnucleome.org/browse/?dataset\\_label=E%2FL+repliseq+on+H1-hESC+cells+%282017-08-17%29&dataset\\_label=E%2FL+repliseq+on+HFFc6+cells+%282017-08-17%29&dataset\\_label=E%2FL+repliseq+on+HFFc6+cells+-+Gold+Standard++%282018-02-06%29&dataset\\_label=TSA-seq+MKI67IP+in+H1+cells&dataset\\_label=TSA-seq+MKI67IP+in+HFFc6+cells&dataset\\_label=TSA-seq+POL1RE+in+H1+cells&dataset\\_label=TSA-seq+POL1RE+in+HFFc6+cells&dataset\\_label=TSA-seq+v2+SON+in+H1&dataset\\_label=TSA-seq+v2+SON+in+HFFc6&dataset\\_label=DamID-seq+on+H1-hESC+cells+%282017-12-14%29&dataset\\_label=DamID-seq+on+HFFc6+cells+%282017-12-14%29&dataset\\_label=ChIA-PET+in+H1-hESC&dataset\\_label=ChIA-PET+in+HFFc6&experiments\\_in\\_set.biosample.biosource.organism.name=human&experiments\\_in\\_set.experiment\\_categorizer.combined=Target%3ALMNB1+protein&experiments\\_in\\_set.experiment\\_categorizer.combined=Target%3ACTCF+protein&experiments\\_in\\_set.experiment\\_categorizer.combined=Target%3ANIFK+protein&experiments\\_in\\_set.experiment\\_categorizer.combined=Target%3APOLR1E+protein&experiments\\_in\\_set.experiment\\_categorizer.combined=Target%3ASON+protein&experiments\\_in\\_set.experiment\\_categorizer.combined=Fraction%3Aearly+fraction+of+2+fractions&experiments\\_in\\_set.experiment\\_categorizer.combined=Fraction%3Alate+fraction+of+2+fractions&experiments\\_in\\_set.experiment\\_categorizer.combined=Target%3ARNA+Pol+II&experiments\\_in\\_set.experiment\\_categorizer.combined=No+value&experimentset\\_type=replicate&type=ExperimentSetReplicate](https://data.4dnucleome.org/browse/?dataset_label=E%2FL+repliseq+on+H1-hESC+cells+%282017-08-17%29&dataset_label=E%2FL+repliseq+on+HFFc6+cells+%282017-08-17%29&dataset_label=E%2FL+repliseq+on+HFFc6+cells+-+Gold+Standard++%282018-02-06%29&dataset_label=TSA-seq+MKI67IP+in+H1+cells&dataset_label=TSA-seq+MKI67IP+in+HFFc6+cells&dataset_label=TSA-seq+POL1RE+in+H1+cells&dataset_label=TSA-seq+POL1RE+in+HFFc6+cells&dataset_label=TSA-seq+v2+SON+in+H1&dataset_label=TSA-seq+v2+SON+in+HFFc6&dataset_label=DamID-seq+on+H1-hESC+cells+%282017-12-14%29&dataset_label=DamID-seq+on+HFFc6+cells+%282017-12-14%29&dataset_label=ChIA-PET+in+H1-hESC&dataset_label=ChIA-PET+in+HFFc6&experiments_in_set.biosample.biosource.organism.name=human&experiments_in_set.experiment_categorizer.combined=Target%3ALMNB1+protein&experiments_in_set.experiment_categorizer.combined=Target%3ACTCF+protein&experiments_in_set.experiment_categorizer.combined=Target%3ANIFK+protein&experiments_in_set.experiment_categorizer.combined=Target%3APOLR1E+protein&experiments_in_set.experiment_categorizer.combined=Target%3ASON+protein&experiments_in_set.experiment_categorizer.combined=Fraction%3Aearly+fraction+of+2+fractions&experiments_in_set.experiment_categorizer.combined=Fraction%3Alate+fraction+of+2+fractions&experiments_in_set.experiment_categorizer.combined=Target%3ARNA+Pol+II&experiments_in_set.experiment_categorizer.combined=No+value&experimentset_type=replicate&type=ExperimentSetReplicate)

## 2. Methods for relating chromatin loops to gene expression.

### Datasets

| Description | Cell Type | Data Source/Download Link |
|-------------|-----------|---------------------------|
|-------------|-----------|---------------------------|

|                                                                 |                                          |                                                                                                                         |
|-----------------------------------------------------------------|------------------------------------------|-------------------------------------------------------------------------------------------------------------------------|
| Loop predictions combined from multiple 4DN experimental assays | H1-ESC                                   | <a href="https://www.jianguoyun.com/p/DQkAPQkQh9qdDBik0cYFIAA">https://www.jianguoyun.com/p/DQkAPQkQh9qdDBik0cYFIAA</a> |
|                                                                 | HFFc6                                    | <a href="https://www.jianguoyun.com/p/Dd-fjT8Qh9qdDBim0cYFIAA">https://www.jianguoyun.com/p/Dd-fjT8Qh9qdDBim0cYFIAA</a> |
| ATAC-Seq peaks                                                  | H1-ESC                                   | 4DN (4DNFI247OOFU)                                                                                                      |
|                                                                 | HFFc6                                    | 4DN (4DNFIWQJFZHS)                                                                                                      |
| House-keeping genes in human                                    | -                                        | HRT Atlas v1.0 ( <a href="https://housekeeping.unicamp.br/">https://housekeeping.unicamp.br/</a> )                      |
| H3K27ac ChIP-Seq signals                                        | H1-ESC                                   | ENCODE (ENCFF986PCY)                                                                                                    |
|                                                                 | HFFc6                                    | 4DN (4DNFINRI6WOL)                                                                                                      |
| ATAC-Seq signals                                                | H1-ESC                                   | 4DN (4DNFICPNO4M5)                                                                                                      |
|                                                                 | HFFc6                                    | 4DN (4DNFIZ9191QU)                                                                                                      |
| CTCF ChIP-Seq signals                                           | H1-ESC                                   | ENCODE (ENCFF332TNJ)                                                                                                    |
|                                                                 | HFFc6                                    | ENCODE (ENCFF406SZM)                                                                                                    |
| LMNB1 DamID-Seq signals                                         | H1-ESC                                   | 4DN (4DNFI6BH48Y3)                                                                                                      |
|                                                                 | HFFc6                                    | 4DN (4DNFI7724Y7Q)                                                                                                      |
| RNA-Seq for 116 tissues / cell types                            | ovary                                    | ENCODE (ENCFF095OFV, ENCFF940WXY, ENCFF857MSA)                                                                          |
|                                                                 | right renal cortex interstitium          | ENCODE (ENCFF320UVF, ENCFF821JAE, ENCFF981FYW)                                                                          |
|                                                                 | hindlimb muscle                          | ENCODE (ENCFF680ZPA)                                                                                                    |
|                                                                 | heart right ventricle                    | ENCODE (ENCFF823DWN, ENCFF102BTQ)                                                                                       |
|                                                                 | A549                                     | ENCODE (ENCFF627QMV, ENCFF369ZNM)                                                                                       |
|                                                                 | chorionic villus                         | ENCODE (ENCFF274JIK, ENCFF101AAR, ENCFF529CAT, ENCFF834AEP)                                                             |
|                                                                 | Panc1                                    | ENCODE (ENCFF890DEQ, ENCFF248YCR)                                                                                       |
|                                                                 | luminal epithelial cell of mammary gland | ENCODE (ENCFF047QOH)                                                                                                    |
|                                                                 | SK-N-SH                                  | ENCODE (ENCFF389TFR, ENCFF161JEA, ENCFF390KQP, ENCFF067ZMG)                                                             |
|                                                                 | natural killer cell                      | ENCODE (ENCFF036GDL)                                                                                                    |

|                                     |                                                                                                                 |
|-------------------------------------|-----------------------------------------------------------------------------------------------------------------|
| testis                              | ENCODE (ENCFF850LMK, ENCFF845QSA)                                                                               |
| RWPE-1                              | ENCODE (SRR8446409, SRR8446410, SRR8446411)                                                                     |
| aorta                               | ENCODE (ENCFF277LBD, ENCFF914RDG)                                                                               |
| germinal matrix                     | ENCODE (ENCFF951YSP)                                                                                            |
| brain                               | ENCODE (ENCFF784ZTQ)                                                                                            |
| right lung                          | ENCODE (ENCFF035KGA, ENCFF535JUK, ENCFF015DMG, ENCFF083YGV, ENCFF487DRK)                                        |
| endodermal cell                     | ENCODE (ENCFF563QGW, ENCFF237ZQX)                                                                               |
| lung                                | ENCODE (ENCFF947WLV, ENCFF051UVH, ENCFF014OUE)                                                                  |
| liver                               | ENCODE (ENCFF239EUU, ENCFF908GIP, ENCFF592KZK, ENCFF203UGC)                                                     |
| myoepithelial cell of mammary gland | ENCODE (ENCFF674EKN)                                                                                            |
| GM23248                             | ENCODE (ENCFF341SCS, ENCFF775DYT)                                                                               |
| endocrine pancreas                  | ENCODE (ENCFF174RSS, ENCFF982TBJ)                                                                               |
| foreskin melanocyte                 | ENCODE (ENCFF441UUO, ENCFF724NAG)                                                                               |
| adrenal gland                       | ENCODE (ENCFF217TKV, ENCFF802ADF, ENCFF555RGZ, ENCFF467PRR, ENCFF866LBS, ENCFF918DYI, ENCFF739OIE, ENCFF908UKE) |
| neural cell                         | ENCODE (ENCFF813LWT, ENCFF081JBX)                                                                               |
| fibroblast of lung                  | ENCODE (ENCFF227FMH, ENCFF983VCS)                                                                               |

---



|                                      |                                                                                             |
|--------------------------------------|---------------------------------------------------------------------------------------------|
| MCF10A                               | ENCODE (SRR5364109, SRR5364108,<br>SRR5364107, SRR5364106)                                  |
| U-87 MG                              | ENCODE (ENCFF164HCK, ENCFF334XLV)                                                           |
| peripheral blood<br>mononuclear cell | ENCODE (ENCFF475DKC, ENCFF443WJD)                                                           |
| spleen                               | ENCODE (ENCFF597SJD, ENCFF693OQP,<br>ENCFF921BKL, ENCFF545TFV,<br>ENCFF809RAX, ENCFF398TQO) |
| hepatocyte                           | ENCODE (ENCFF138JDF, ENCFF797ZIB)                                                           |
| neural stem progenitor cell          | ENCODE (ENCFF789VZB, ENCFF183XSM)                                                           |
| foreskin fibroblast                  | ENCODE (ENCFF219FYH, ENCFF964QLH)                                                           |
| MCF7                                 | ENCODE (ENCFF009GDJ, ENCFF885LEQ)                                                           |
| BJ                                   | ENCODE (ENCFF800TGS, ENCFF839MWS)                                                           |
| fibroblast of breast                 | ENCODE (ENCFF355QNL, ENCFF281CHW)                                                           |
| smooth muscle cell                   | ENCODE (ENCFF003QAY, ENCFF852RUU)                                                           |
| placenta                             | ENCODE (ENCFF435PHN)                                                                        |
| renal cortex interstitium            | ENCODE (ENCFF656GXW, ENCFF885EHC,<br>ENCFF067NHZ)                                           |
| UCSF-4                               | ENCODE (ENCFF219WTP)                                                                        |
| heart left ventricle                 | ENCODE (ENCFF860DPP, ENCFF998SEL)                                                           |
| NCI-H460                             | ENCODE (ENCFF322HJX, ENCFF011JTT,<br>ENCFF522SUJ)                                           |
| cardiac muscle cell                  | ENCODE (ENCFF761ACO, ENCFF509IXK)                                                           |
| HEK293                               | ENCODE (SRR5137672, SRR5137671,<br>SRR5137670)                                              |

|                          |                                                                                                                                                                                                                         |
|--------------------------|-------------------------------------------------------------------------------------------------------------------------------------------------------------------------------------------------------------------------|
| mesodermal cell          | ENCODE (ENCFF553EAV, ENCFF749RUQ)                                                                                                                                                                                       |
| adipose tissue           | ENCODE (ENCFF878UHQ, ENCFF862LZV, ENCFF732LRY, ENCFF272HOG)                                                                                                                                                             |
| GM12878                  | ENCODE (ENCFF200USH, ENCFF905XDJ, ENCFF644DIQ, ENCFF456WWG, ENCFF876LUX, ENCFF886FDY, ENCFF121ZOP, ENCFF599JTV, ENCFF545OJE, ENCFF853VUK, ENCFF392CRO, ENCFF102NLY, ENCFF315WZE, ENCFF477JYI, ENCFF902UYP, ENCFF550OHK) |
| CD14-positive monocyte   | ENCODE (ENCFF397DFK, ENCFF299BIL, ENCFF219ECV)                                                                                                                                                                          |
| skeletal muscle myoblast | ENCODE (ENCFF505GUJ, ENCFF354AZS)                                                                                                                                                                                       |
| skin fibroblast          | ENCODE (ENCFF694YJO, ENCFF202DSC, ENCFF458PJZ, ENCFF959PRH)                                                                                                                                                             |
| muscle of leg            | ENCODE (ENCFF125HHE, ENCFF068NMI, ENCFF393OUO, ENCFF884IWB, ENCFF316SOJ, ENCFF559DXJ, ENCFF622TLD, ENCFF114CDE, ENCFF398PFM)                                                                                            |
| layer of hippocampus     | ENCODE (ENCFF323NAG)                                                                                                                                                                                                    |
| HT1080                   | ENCODE (ENCFF091WWB, ENCFF748NPL, ENCFF241KQK, ENCFF284XTA)                                                                                                                                                             |
| HFFc6                    | 4DN (4DNFI5MR6C3G, 4DNFIF3H5ZCH)                                                                                                                                                                                        |
| ectodermal cell          | ENCODE (ENCFF034KRQ, ENCFF419KMW, ENCFF691ZYQ, ENCFF768SPT)                                                                                                                                                             |

---

|                                |                                                                                                                 |
|--------------------------------|-----------------------------------------------------------------------------------------------------------------|
| foreskin keratinocyte          | ENCODE (ENCFF680BHT, ENCFF994UBN, ENCFF892CWH, ENCFF051VYX)                                                     |
| PFSK-1                         | ENCODE (ENCFF635ALW, ENCFF568GAV)                                                                               |
| left renal cortex interstitium | ENCODE (ENCFF507HAK, ENCFF068QRU, ENCFF869JYV, ENCFF278ZFZ)                                                     |
| SK-N-DZ                        | ENCODE (ENCFF635RKM, ENCFF594NJL, ENCFF499DSN, ENCFF611SKK)                                                     |
| chorion                        | ENCODE (ENCFF550CHR, ENCFF364QYB, ENCFF672UJB, ENCFF397ZBW)                                                     |
| kidney                         | ENCODE (ENCFF525CMT, ENCFF804WTK, ENCFF099FXO, ENCFF229DFM, ENCFF326MQO)                                        |
| trophoblast                    | ENCODE (ENCFF768QIJ, ENCFF591XIE, ENCFF270MHZ, ENCFF873XNT)                                                     |
| left kidney                    | ENCODE (ENCFF593SHI)                                                                                            |
| B cell                         | ENCODE (ENCFF770XDU, ENCFF231GYC, ENCFF485EUP)                                                                  |
| GM23338                        | ENCODE (ENCFF305XIS, ENCFF149CBS)                                                                               |
| keratinocyte                   | ENCODE (ENCFF401JWS, ENCFF344FGV, ENCFF065UCN, ENCFF697CPR, ENCFF734GZX, ENCFF345YOV, ENCFF330VCJ, ENCFF165MYR) |
| thymus                         | ENCODE (ENCFF487KXD, ENCFF118YIZ, ENCFF380IZG, ENCFF237HIP, ENCFF432EQO, ENCFF123LVM, ENCFF608SHV)              |

---

|                                          |                                                                                                                                           |
|------------------------------------------|-------------------------------------------------------------------------------------------------------------------------------------------|
| HepG2                                    | ENCODE (ENCFF640ZBJ, ENCFF861GCR, ENCFF534SLQ, ENCFF945LNB, ENCFF197XZL, ENCFF874RXH, ENCFF401KRE, ENCFF004HYK)                           |
| left lung                                | ENCODE (ENCFF066QDJ, ENCFF919EYT, ENCFF934RBH, ENCFF643UJO, ENCFF391BNP, ENCFF406OKZ)                                                     |
| common myeloid progenitor, CD34-positive | ENCODE (ENCFF690QPA)                                                                                                                      |
| AG04450                                  | ENCODE (ENCFF025DRM, ENCFF350BOF)                                                                                                         |
| stomach                                  | ENCODE (ENCFF874WKO, ENCFF031EAX, ENCFF881ZXZ, ENCFF953SNL, ENCFF850QFV, ENCFF815DCS, ENCFF082DAH, ENCFF775TWS, ENCFF648ZHB, ENCFF050VJS) |
| pancreas                                 | ENCODE (ENCFF625HJC, ENCFF390JAT, ENCFF971GFG)                                                                                            |
| renal pelvis                             | ENCODE (ENCFF524ZGN, ENCFF237VRQ, ENCFF013EVX)                                                                                            |
| T-cell                                   | ENCODE (ENCFF158VJT)                                                                                                                      |
| muscle of trunk                          | ENCODE (ENCFF073LSZ, ENCFF419PGC)                                                                                                         |
| esophagus                                | ENCODE (ENCFF993JBC, ENCFF566SLH)                                                                                                         |
| 293T                                     | ENCODE (SRR12137695, SRR12137698, SRR12137696, SRR12137697)                                                                               |
| sigmoid colon                            | ENCODE (ENCFF474EOZ, ENCFF904HJO, ENCFF362GHJ, ENCFF395HHA)                                                                               |
| spinal cord                              | ENCODE (ENCFF144IMD, ENCFF400RFD, ENCFF340FSS)                                                                                            |
| forelimb muscle                          | ENCODE (ENCFF927KFT)                                                                                                                      |

|                               |                                                                                                                                                                     |
|-------------------------------|---------------------------------------------------------------------------------------------------------------------------------------------------------------------|
| muscle of arm                 | ENCODE (ENCFF404ZXJ, ENCFF993LHQ, ENCFF350ZWB, ENCFF272NAO, ENCFF726VKQ, ENCFF603FIV, ENCFF905BGI, ENCFF038FYS, ENCFF007LRI, ENCFF513PLX, ENCFF647PIL, ENCFF690YGY) |
| urinary bladder               | ENCODE (ENCFF986LPX)                                                                                                                                                |
| H1                            | ENCODE (ENCFF059UBK, ENCFF667AIY, ENCFF741PUY, ENCFF235XMZ, ENCFF113VWX, ENCFF915AUQ, ENCFF653XHG)                                                                  |
| mesenchymal stem cell         | ENCODE (ENCFF693WRN, ENCFF290OQE)                                                                                                                                   |
| astrocyte                     | ENCODE (ENCFF256APB)                                                                                                                                                |
| psoas muscle                  | ENCODE (ENCFF543WCB, ENCFF630ZKI, ENCFF489IIG)                                                                                                                      |
| NB4                           | ENCODE (SRR6006856, SRR6006857, SRR6006858)                                                                                                                         |
| fibroblast of skin of abdomen | ENCODE (ENCFF327BZW, ENCFF063EGA)                                                                                                                                   |
| Jurkat clone E61              | ENCODE (ENCFF489SJY, ENCFF558JTV)                                                                                                                                   |
| IMR90                         | ENCODE (ENCFF244VME, ENCFF118OFK)                                                                                                                                   |
| mammary epithelial cell       | ENCODE (ENCFF380GBC, ENCFF370XTW)                                                                                                                                   |
| SK-MEL-5                      | ENCODE (ENCFF620LZN, ENCFF845RTT, ENCFF070UJX, ENCFF448BML)                                                                                                         |
| mesendoderm                   | ENCODE (ENCFF466QUZ, ENCFF044YLS)                                                                                                                                   |
| HUVEC                         | ENCODE (ENCFF917CHS, ENCFF804WUK, ENCFF650CVW, ENCFF238WEU)                                                                                                         |

---

|                                 |                                                                                                                                                                                               |
|---------------------------------|-----------------------------------------------------------------------------------------------------------------------------------------------------------------------------------------------|
| small intestine                 | ENCODE (ENCFF411RSF, ENCFF769FAA, ENCFF309DZJ, ENCFF845OKW, ENCFF647PTK, ENCFF686JQP, ENCFF537WNL, ENCFF080HMB, ENCFF256ELA, ENCFF970SOK)                                                     |
| heart                           | ENCODE (ENCFF227RBV, ENCFF089NNQ, ENCFF496OSH)                                                                                                                                                |
| muscle of back                  | ENCODE (ENCFF706VUD, ENCFF382FLL, ENCFF313PHN, ENCFF302HTI, ENCFF282SUS, ENCFF424LYQ, ENCFF115ORA, ENCFF195KMJ, ENCFF185TFE, ENCFF860PYR)                                                     |
| neurosphere                     | ENCODE (ENCFF153QRP, ENCFF707AMK, ENCFF993ZTH)                                                                                                                                                |
| K562                            | ENCODE (ENCFF490IGF, ENCFF022QGS, ENCFF768TKT, ENCFF172GIN, ENCFF026BMH, ENCFF868MFR, ENCFF937GNL, ENCFF047WAI, ENCFF427EWZ, ENCFF342LXD, ENCFF472EUD, ENCFF185UMS, ENCFF461HPX, ENCFF156DDL) |
| CD8-positive, alpha-beta T cell | ENCODE (ENCFF372OMD, ENCFF088DIY)                                                                                                                                                             |
| cerebellum                      | ENCODE (ENCFF777IQQ)                                                                                                                                                                          |
| mammary stem cell               | ENCODE (ENCFF692TAL)                                                                                                                                                                          |
| amnion                          | ENCODE (ENCFF144PZJ, ENCFF443KUS, ENCFF416MQP)                                                                                                                                                |
| placental basal plate           | ENCODE (ENCFF345ADJ, ENCFF457JWP, ENCFF434YJO, ENCFF026SBP)                                                                                                                                   |

---

|                                                  |                                                                                                           |                                                                                                                 |
|--------------------------------------------------|-----------------------------------------------------------------------------------------------------------|-----------------------------------------------------------------------------------------------------------------|
|                                                  | HeLa-S3                                                                                                   | ENCODE (ENCFF846THO, ENCFF796REI, ENCFF010RHX, ENCFF206NFZ, ENCFF344HRY, ENCFF514TNR, ENCFF922LIV, ENCFF101GPJ) |
|                                                  | BE2C                                                                                                      | ENCODE (ENCFF396XRF, ENCFF238HUZ)                                                                               |
|                                                  | HUES64                                                                                                    | ENCODE (ENCFF339WEH, ENCFF682DUY)                                                                               |
|                                                  | left renal pelvis                                                                                         | ENCODE (ENCFF126KII, ENCFF602NKQ, ENCFF720JRI, ENCFF774PTF)                                                     |
|                                                  | mole                                                                                                      | ENCODE (ENCFF726KPQ)                                                                                            |
|                                                  | right renal pelvis                                                                                        | ENCODE (ENCFF033EGX, ENCFF887YTL, ENCFF494FTI, ENCFF896OFQ)                                                     |
|                                                  | trophoblast cell                                                                                          | ENCODE (ENCFF342LYI, ENCFF760HDK)                                                                               |
|                                                  | Purkinje cell                                                                                             | ENCODE (ENCFF683XBG, ENCFF890PPZ)                                                                               |
|                                                  | CD4-positive, alpha-beta T cell                                                                           | ENCODE (ENCFF760LWW, ENCFF794NBU)                                                                               |
|                                                  | large intestine                                                                                           | ENCODE (ENCFF615SUS, ENCFF688MYF, ENCFF554XMC, ENCFF359YQU, ENCFF972VRS, ENCFF458LNT, ENCFF858BYE)              |
|                                                  | right cardiac atrium                                                                                      | ENCODE (ENCFF635SOC)                                                                                            |
| CTCF ChIA-PET for 32 cell lines or primary cells | CD4-positive, alpha-beta T cell                                                                           | ENCODE (ENCSR345UIQ)                                                                                            |
|                                                  | activated CD8-positive, alpha-beta T cell (treated with anti-CD3 and anti-CD28 coated beads for 36 hours) | ENCODE (ENCSR408MRB)                                                                                            |
|                                                  | IMR-90                                                                                                    | ENCODE (ENCSR076TTY)                                                                                            |
|                                                  | OCI-LY7                                                                                                   | ENCODE (ENCSR401JWQ)                                                                                            |
|                                                  | A673                                                                                                      | ENCODE (ENCSR549TMF)                                                                                            |
|                                                  | CD4-positive, alpha-beta memory T cell                                                                    | ENCODE (ENCSR106INW)                                                                                            |
|                                                  |                                                                                                           |                                                                                                                 |

|                                                                                                                                                   |                                   |
|---------------------------------------------------------------------------------------------------------------------------------------------------|-----------------------------------|
| CD8-positive, alpha-beta T cell                                                                                                                   | ENCODE (ENCSR180GEY)              |
| HUVEC                                                                                                                                             | ENCODE (ENCSR404FPI)              |
| activated CD8-positive, alpha-beta memory T cell (treated with anti-CD3 and anti-CD28 coated beads for 36 hours)                                  | ENCODE (ENCSR697ZHG)              |
| activated CD8-positive, alpha-beta memory T cell (treated with 10 ng/mL Interleukin-2 for 5 days, anti-CD3 and anti-CD28 coated beads for 7 days) | ENCODE (ENCSR378IUJ)              |
| activated CD8-positive, alpha-beta T cell (treated with 10 ng/mL Interleukin-2 for 5 days, anti-CD3 and anti-CD28 coated beads for 7 days)        | ENCODE (ENCSR531UMR)              |
| naive thymus-derived CD4-positive, alpha-beta T cell                                                                                              | ENCODE (ENCSR120LMS)              |
| K562                                                                                                                                              | ENCODE (ENCSR597AKG)              |
| activated CD4-positive, alpha-beta memory T cell (treated with 10 ng/mL Interleukin-2 for 5 days, anti-CD3 and anti-CD28 coated beads for 7 days) | ENCODE (ENCSR291RCO)              |
| activated CD4-positive, alpha-beta T cell (treated with 10 ng/mL Interleukin-2 for 5 days, anti-CD3 and anti-CD28 coated beads for 7 days)        | ENCODE (ENCSR962FFY)              |
| activated T-cell (treated with 50 U/mL Interleukin-2 for 72 hours, anti-CD3 and anti-CD28 coated beads for 72 hours)                              | ENCODE (ENCSR411UEL, ENCSR038GON) |
| CD8-positive, alpha-beta memory T cell                                                                                                            | ENCODE (ENCSR187PXW)              |

---



|                                                          |                                                                                                                              |                                   |
|----------------------------------------------------------|------------------------------------------------------------------------------------------------------------------------------|-----------------------------------|
|                                                          | T-cell                                                                                                                       | ENCODE (ENCSR545NUL, ENCSR592BWZ) |
|                                                          | Caco-2                                                                                                                       | ENCODE (ENCSR185PEE)              |
|                                                          | WTC11                                                                                                                        | ENCODE (ENCSR016VPZ)              |
|                                                          | A549                                                                                                                         | ENCODE (ENCSR911ZMB)              |
|                                                          | GM12878                                                                                                                      | ENCODE (ENCSR184YZV)              |
|                                                          | activated CD4-positive,<br>alpha-beta memory T cell<br>(treated with anti-CD3 and<br>anti-CD28 coated beads for<br>36 hours) | ENCODE (ENCSR154MAJ)              |
|                                                          | MCF10A                                                                                                                       | ENCODE (ENCSR403ZYJ)              |
|                                                          | MCF-7                                                                                                                        | ENCODE (ENCSR200VHL)              |
|                                                          | activated B cell (treated with<br>0.5 $\mu$ M CpG ODN for 24<br>hours)                                                       | ENCODE (ENCSR494NNF)              |
|                                                          | activated naive CD4-<br>positive, alpha-beta T cell<br>(treated with anti-CD3 and<br>anti-CD28 coated beads for<br>36 hours) | ENCODE (ENCSR731OFF)              |
|                                                          | HCT116                                                                                                                       | ENCODE (ENCSR278IZK)              |
|                                                          | activated CD4-positive,<br>alpha-beta T cell (treated<br>with anti-CD3 and anti-<br>CD28 coated beads for 36<br>hours)       | ENCODE (ENCSR093CTT)              |
|                                                          | HepG2                                                                                                                        | ENCODE (ENCSR411IVB)              |
|                                                          | Panc1                                                                                                                        | ENCODE (ENCSR145PYF)              |
|                                                          | B-cell                                                                                                                       | ENCODE (ENCSR536ZNI)              |
| RNAPII ChIA-PET for<br>32 cell lines or primary<br>cells | CD4-positive, alpha-beta T<br>cell                                                                                           | ENCODE (ENCSR448ZLA)              |
|                                                          | activated CD8-positive,<br>alpha-beta T cell (treated<br>with anti-CD3 and anti-<br>CD28 coated beads for 36<br>hours)       | ENCODE (ENCSR982KEM)              |
|                                                          | IMR-90                                                                                                                       | ENCODE (ENCSR966RPQ)              |
|                                                          | OCI-LY7                                                                                                                      | ENCODE (ENCSR882BUM)              |
|                                                          | A673                                                                                                                         | ENCODE (ENCSR623KNI)              |
|                                                          | CD4-positive, alpha-beta<br>memory T cell                                                                                    | ENCODE (ENCSR569TBN)              |

|                                                                                                                                                   |                                                |
|---------------------------------------------------------------------------------------------------------------------------------------------------|------------------------------------------------|
| CD8-positive, alpha-beta T cell                                                                                                                   | ENCODE (ENCSR185VQH)                           |
| HUVEC                                                                                                                                             | ENCODE (ENCSR080OMN)                           |
| activated CD8-positive, alpha-beta memory T cell (treated with anti-CD3 and anti-CD28 coated beads for 36 hours)                                  | ENCODE (ENCSR041UPG)                           |
| activated CD8-positive, alpha-beta memory T cell (treated with 10 ng/mL Interleukin-2 for 5 days, anti-CD3 and anti-CD28 coated beads for 7 days) | ENCODE (ENCSR114KEO)                           |
| activated CD8-positive, alpha-beta T cell (treated with 10 ng/mL Interleukin-2 for 5 days, anti-CD3 and anti-CD28 coated beads for 7 days)        | ENCODE (ENCSR217TFN)                           |
| naive thymus-derived CD4-positive, alpha-beta T cell K562                                                                                         | ENCODE (ENCSR763OCG)<br>ENCODE (ENCSR880DSH)   |
| activated CD4-positive, alpha-beta memory T cell (treated with 10 ng/mL Interleukin-2 for 5 days, anti-CD3 and anti-CD28 coated beads for 7 days) | ENCODE (ENCSR159PXF)                           |
| activated CD4-positive, alpha-beta T cell (treated with 10 ng/mL Interleukin-2 for 5 days, anti-CD3 and anti-CD28 coated beads for 7 days)        | ENCODE (ENCSR733XLQ)                           |
| activated T-cell (treated with 50 U/mL Interleukin-2 for 72 hours, anti-CD3 and anti-CD28 coated beads for 72 hours)                              | ENCODE (ENCSR165FXG, ENCSR891IMI, ENCSR538SBO) |
| CD8-positive, alpha-beta memory T cell                                                                                                            | ENCODE (ENCSR149TQU)                           |

---

|                                                          |                                                                                                                              |                                                                |
|----------------------------------------------------------|------------------------------------------------------------------------------------------------------------------------------|----------------------------------------------------------------|
|                                                          | T-cell                                                                                                                       | ENCODE (ENCSR722NQM, ENCSR743YTL)                              |
|                                                          | Caco-2                                                                                                                       | ENCODE (ENCSR713NCY)                                           |
|                                                          | WTC11                                                                                                                        | ENCODE (ENCSR972JTN)                                           |
|                                                          | A549                                                                                                                         | ENCODE (ENCSR138NSW)                                           |
|                                                          | GM12878                                                                                                                      | ENCODE (ENCSR905HWW)                                           |
|                                                          | activated CD4-positive,<br>alpha-beta memory T cell<br>(treated with anti-CD3 and<br>anti-CD28 coated beads for<br>36 hours) | ENCODE (ENCSR877ZRR)                                           |
|                                                          | MCF10A                                                                                                                       | ENCODE (ENCSR499JGQ)                                           |
|                                                          | MCF-7                                                                                                                        | ENCODE (ENCSR059HDE)                                           |
|                                                          | activated B cell (treated with<br>0.5 $\mu$ M CpG ODN for 24<br>hours)                                                       | ENCODE (ENCSR096ZPB)                                           |
|                                                          | activated naive CD4-<br>positive, alpha-beta T cell<br>(treated with anti-CD3 and<br>anti-CD28 coated beads for<br>36 hours) | ENCODE (ENCSR402NAQ)                                           |
|                                                          | HCT116                                                                                                                       | ENCODE (ENCSR035PVZ)                                           |
|                                                          | activated CD4-positive,<br>alpha-beta T cell (treated<br>with anti-CD3 and anti-<br>CD28 coated beads for 36<br>hours)       | ENCODE (ENCSR314TNQ)                                           |
|                                                          | HepG2                                                                                                                        | ENCODE (ENCSR789ZIJ, ENCSR857MYZ)                              |
|                                                          | Panc1                                                                                                                        | ENCODE (ENCSR447IUA)                                           |
|                                                          | B-cell                                                                                                                       | ENCODE (ENCSR172WWJ)                                           |
| DNase-Seq peaks for<br>32 cell lines or primary<br>cells | CD4-positive, alpha-beta T<br>cell                                                                                           | ENCODE (ENCFF138ZRF, ENCFF396CHT,<br>ENCFF348SDZ, ENCFF147ZBC) |
|                                                          | activated CD8-positive,<br>alpha-beta T cell (treated<br>with anti-CD3 and anti-<br>CD28 coated beads for 36<br>hours)       | ENCODE (ENCFF834QBM)                                           |
|                                                          | IMR-90                                                                                                                       | ENCODE (ENCFF800DVI, ENCFF525PWS)                              |

|                                                                                                                                                   |                                                             |
|---------------------------------------------------------------------------------------------------------------------------------------------------|-------------------------------------------------------------|
| OCI-LY7                                                                                                                                           | ENCODE (ENCFF196DIZ, ENCFF903CVK)                           |
| A673                                                                                                                                              | ENCODE (ENCFF607YBN, ENCFF355NVJ, ENCFF606OTK)              |
| CD4-positive, alpha-beta memory T cell                                                                                                            | ENCODE (ENCFF157MKK, ENCFF967NLQ, ENCFF386UFI, ENCFF010BIN) |
| CD8-positive, alpha-beta T cell                                                                                                                   | ENCODE (ENCFF070WZM, ENCFF792FLJ, ENCFF326MXR, ENCFF017FZE) |
| HUVEC                                                                                                                                             | ENCODE (ENCFF833UNB, ENCFF136MYL, ENCFF406AWN)              |
| activated CD8-positive, alpha-beta memory T cell (treated with anti-CD3 and anti-CD28 coated beads for 36 hours)                                  | ENCODE (ENCFF401WTQ, ENCFF848EBC, ENCFF713XCT, ENCFF810ZJY) |
| activated CD8-positive, alpha-beta memory T cell (treated with 10 ng/mL Interleukin-2 for 5 days, anti-CD3 and anti-CD28 coated beads for 7 days) | ENCODE (ENCFF792PYU)                                        |
| activated CD8-positive, alpha-beta T cell (treated with 10 ng/mL Interleukin-2 for 5 days, anti-CD3 and anti-CD28 coated beads for 7 days)        | ENCODE (ENCFF596UGI)                                        |
| naive thymus-derived CD4-positive, alpha-beta T cell                                                                                              | ENCODE (ENCFF885PJD, ENCFF937FLI, ENCFF901UGO, ENCFF951XVJ) |
| K562                                                                                                                                              | ENCODE (ENCFF274YGF, ENCFF264UFX, ENCFF185XRG, ENCFF807ICZ) |
| activated CD4-positive, alpha-beta memory T cell (treated with 10 ng/mL Interleukin-2 for 5 days, anti-                                           | ENCODE (ENCFF552TYH)                                        |

CD3 and anti-CD28 coated  
beads for 7 days)

activated CD4-positive,  
alpha-beta T cell (treated  
with 10 ng/mL Interleukin-2  
for 5 days, anti-CD3 and  
anti-CD28 coated beads for  
7 days)

ENCODE (ENCFF765OGD)

activated T-cell (treated with  
50 U/mL Interleukin-2 for 72  
hours, anti-CD3 and anti-  
CD28 coated beads for 72  
hours)

ENCODE (ENCFF725EBY, ENCFF168GAN)

CD8-positive, alpha-beta  
memory T cell

ENCODE (ENCFF931AKV, ENCFF375PHK,  
ENCFF041GGN, ENCFF224KBE)

T-cell

ENCODE (ENCFF873FYV, ENCFF729DOV,  
ENCFF933QZD, ENCFF839QLN)

Caco-2

ENCODE (ENCFF810WJX, ENCFF637OJO,  
ENCFF948AMM, ENCFF579UXQ)

WTC11

ENCODE (ENCFF668BJR, ENCFF854DSG)

A549

ENCODE (ENCFF128ZVL, ENCFF410KIB,  
ENCFF302JWZ)

GM12878

ENCODE (ENCFF338SAU, ENCFF759OLD)

activated CD4-positive,  
alpha-beta memory T cell  
(treated with anti-CD3 and  
anti-CD28 coated beads for  
36 hours)

ENCODE (ENCFF067SGU)

MCF10A

ENCODE (ENCFF667FTX)

MCF-7

ENCODE (ENCFF107HQA, ENCFF886OJN,  
ENCFF835KCG, ENCFF536CIK)

|                                                                                                                                  |                                                                |
|----------------------------------------------------------------------------------------------------------------------------------|----------------------------------------------------------------|
| activated B cell (treated with<br>0.5 $\mu$ M CpG ODN for 24<br>hours)                                                           | ENCODE (ENCFF489NNB)                                           |
| activated naive CD4-<br>positive, alpha-beta T cell<br>(treated with anti-CD3 and<br>anti-CD28 coated beads for<br>36 hours)     | ENCODE (ENCFF261QWU)                                           |
| HCT116<br>activated CD4-positive,<br>alpha-beta T cell (treated<br>with anti-CD3 and anti-<br>CD28 coated beads for 36<br>hours) | ENCODE (ENCFF356GTJ, ENCFF240LRP)<br><br>ENCODE (ENCFF107XDE)  |
| HepG2                                                                                                                            | ENCODE (ENCFF748QCZ, ENCFF897NME,<br>ENCFF453AEP)              |
| Panc1                                                                                                                            | ENCODE (ENCFF415BYA, ENCFF842AOT)                              |
| B-cell                                                                                                                           | ENCODE (ENCFF262LZH, ENCFF245RKH,<br>ENCFF526MQV, ENCFF248ACA) |

### 3. Method for SPIN states identification and analysis

#### Data availability

| Cell Type | Experiment Type  | Data Type       | Data Source/Download Link        | Note1 |
|-----------|------------------|-----------------|----------------------------------|-------|
| H1-ESC    | SON TSA-seq      | Signal (BigWig) | 4DN (4DNESUTK6QWG, 4DNESC3D6NGQ) |       |
|           | LaminB TSA-seq   | Signal (BigWig) | 4DN (4DNESHZ8WKRX, 4DNESGGXKI1H) |       |
|           | Nucleous TSA-seq | Signal (BigWig) | 4DN (4DNESO6HFSAD, 4DNES6PANOF4) |       |
|           | LaminB DamID     | Signal (BigWig) | 4DN (4DNESOFQR5FS, 4DNESXKBPZKQ) |       |
|           | Hi-C             | Contact matrix  | 4DN (4DNESX75DD7R, 4DNES2M5JIGV) |       |

|                          |                 |                      |                                                                       |
|--------------------------|-----------------|----------------------|-----------------------------------------------------------------------|
| H2AFZ ChIP-Seq           | Signal (BigWig) | ENCODE (ENCFF758YFI) |                                                                       |
| H3K27ac ChIP-Seq         | Signal (BigWig) | ENCODE (ENCFF771GNB) |                                                                       |
| H3K27me3 ChIP-Seq        | Signal (BigWig) | ENCODE (ENCFF277UCT) |                                                                       |
| H3K36me3 ChIP-Seq        | Signal (BigWig) | ENCODE (ENCFF687LJF) |                                                                       |
| H3K4me1 ChIP-Seq         | Signal (BigWig) | ENCODE (ENCFF335ZGP) |                                                                       |
| H3K4me2 ChIP-Seq         | Signal (BigWig) | ENCODE (ENCFF501AUN) |                                                                       |
| H3K4me3 ChIP-Seq         | Signal (BigWig) | ENCODE (ENCFF698DKQ) |                                                                       |
| H3K79me2 ChIP-Seq        | Signal (BigWig) | ENCODE (ENCFF640WRD) |                                                                       |
| H3K9ac ChIP-Seq          | Signal (BigWig) | ENCODE (ENCFF890MIB) |                                                                       |
| H3K9me3 ChIP-Seq         | Signal (BigWig) | ENCODE (ENCFF358AWN) |                                                                       |
| H4K20me1 ChIP-Seq        | Signal (BigWig) | ENCODE (ENCFF453OCL) |                                                                       |
| 16-fraction Repli-seq G1 | Alignment (Bam) | 4DN (4DNES2W2DXM6)   | The smoothed and normalized RT score can be downloaded from GSE137764 |
| 16-fraction Repli-seq S1 | Alignment (Bam) | 4DN (4DNES8GLHOD6)   |                                                                       |
| 16-fraction Repli-seq S2 | Alignment (Bam) | 4DN (4DNESWWMQ1IC)   |                                                                       |
| 16-fraction Repli-seq S3 | Alignment (Bam) | 4DN (4DNES2LV4C4Q)   |                                                                       |
| 16-fraction Repli-seq S4 | Alignment (Bam) | 4DN (4DNES2RXY8IB)   |                                                                       |
| 16-fraction Repli-seq S5 | Alignment (Bam) | 4DN (4DNESVX7IH76)   |                                                                       |
| 16-fraction Repli-seq S6 | Alignment (Bam) | 4DN (4DNESL0M1MB7)   |                                                                       |
| 16-fraction Repli-seq S7 | Alignment (Bam) | 4DN (4DNESR9FVS6K)   |                                                                       |
| 16-fraction Repli-seq S8 | Alignment (Bam) | 4DN (4DNESFMEOEHW)   |                                                                       |
| 16-fraction Repli-seq S9 | Alignment (Bam) | 4DN (4DNESBZIJJ1E)   |                                                                       |

|       |                                 |                    |                                                                        |                                                                                                                           |
|-------|---------------------------------|--------------------|------------------------------------------------------------------------|---------------------------------------------------------------------------------------------------------------------------|
|       | 16-fraction<br>Repli-seq S10    | Alignment<br>(Bam) | 4DN (4DNESDZOL2VU)                                                     |                                                                                                                           |
|       | 16-fraction<br>Repli-seq S11    | Alignment<br>(Bam) | 4DN (4DNESJJK0IH4)                                                     |                                                                                                                           |
|       | 16-fraction<br>Repli-seq S12    | Alignment<br>(Bam) | 4DN (4DNES4I9OXS7)                                                     |                                                                                                                           |
|       | 16-fraction<br>Repli-seq S13    | Alignment<br>(Bam) | 4DN (4DNES6G2SSN2)                                                     |                                                                                                                           |
|       | 16-fraction<br>Repli-seq S14    | Alignment<br>(Bam) | 4DN (4DNESGY7RRTV)                                                     |                                                                                                                           |
|       | 16-fraction<br>Repli-seq S15    | Alignment<br>(Bam) | 4DN (4DNESYIVVMOC)                                                     |                                                                                                                           |
|       | 16-fraction<br>Repli-seq S16    | Alignment<br>(Bam) | 4DN (4DNESIK2HK47)                                                     |                                                                                                                           |
|       | iMARGI                          | Read<br>pairs      | 4DN (4DNESOB RUQ12,<br>4DNES8B3R3P8,<br>4DNESGRI8A8N,<br>4DNESNOJ7HY7) | Only interchromosomal repetitive<br>element (RE)-containing chromatin-<br>associated RNAs (caRNAs) read pairs<br>are used |
| HFFc6 | SON TSA-seq                     | Signal<br>(BigWig) | 4DN (4DNESB5I8TGR,<br>4DNES85R9TIB)                                    |                                                                                                                           |
|       | LaminB TSA-<br>seq              | Signal<br>(BigWig) | 4DN (4DNES16C6XVY,<br>4DNESMF4T7QQ)                                    |                                                                                                                           |
|       | Nucleous TSA-<br>seq            | Signal<br>(BigWig) | 4DN (4DNESGAR9ZBW,<br>4DNES2RN8ZJ1)                                    |                                                                                                                           |
|       | LaminB DamID                    | Signal<br>(BigWig) | 4DN (4DNESOO COBBA,<br>4DNESXZ4FW4T)                                   |                                                                                                                           |
|       | Hi-C                            | Contact<br>matrix  | 4DN (4DNESNMAAN97,<br>4DNES2R6PUEK)                                    |                                                                                                                           |
|       | Imputed<br>H2AFZ ChIP-<br>Seq   | Signal<br>(BigWig) | 4DN (4DNFIB79WDUY)                                                     |                                                                                                                           |
|       | Imputed<br>H3K27ac<br>ChIP-Seq  | Signal<br>(BigWig) | 4DN (4DNFIBNZ478I)                                                     |                                                                                                                           |
|       | Imputed<br>H3K27me3<br>ChIP-Seq | Signal<br>(BigWig) | 4DN (4DNFIMJHO898)                                                     |                                                                                                                           |
|       | Imputed<br>H3K36me3<br>ChIP-Seq | Signal<br>(BigWig) | 4DN (4DNFIDU8WT76)                                                     |                                                                                                                           |
|       | Imputed<br>H3K4me1<br>ChIP-Seq  | Signal<br>(BigWig) | 4DN (4DNFIBC1VSF6)                                                     |                                                                                                                           |



|                                 |                    |                    |                                                                                                                           |
|---------------------------------|--------------------|--------------------|---------------------------------------------------------------------------------------------------------------------------|
| Imputed<br>H3K4me2<br>ChIP-Seq  | Signal<br>(BigWig) | 4DN (4DNFIFB7SHA1) |                                                                                                                           |
| Imputed<br>H3K4me3<br>ChIP-Seq  | Signal<br>(BigWig) | 4DN (4DNFIKRPF9QP) |                                                                                                                           |
| Imputed<br>H3K79me2<br>ChIP-Seq | Signal<br>(BigWig) | 4DN (4DNFIBS37Z1K) |                                                                                                                           |
| Imputed<br>H3K9ac ChIP-<br>Seq  | Signal<br>(BigWig) | 4DN (4DNFINBZ9NNY) |                                                                                                                           |
| Imputed<br>H3K9me3<br>ChIP-Seq  | Signal<br>(BigWig) | 4DN (4DNFILJFE7WW) |                                                                                                                           |
| Imputed<br>H4K20me1<br>ChIP-Seq | Signal<br>(BigWig) | 4DN (4DNFI13RAB7H) |                                                                                                                           |
| CUT&RUN<br>CTCF                 | Raw<br>(fastq)     | 4DN (4DNES1RQBHPK) |                                                                                                                           |
| CUT&RUN<br>H2A.Z                | Raw<br>(fastq)     | 4DN (4DNESHPUFWTR) |                                                                                                                           |
| CUT&RUN<br>H3K27ac              | Raw<br>(fastq)     | 4DN (4DNESIMWCLF8) |                                                                                                                           |
| CUT&RUN<br>H3K27me3             | Raw<br>(fastq)     | 4DN (4DNES8TY5P5P) |                                                                                                                           |
| CUT&RUN<br>H3K4me1              | Raw<br>(fastq)     | 4DN (4DNESRFWR5SV) |                                                                                                                           |
| CUT&RUN<br>H3K4me2              | Raw<br>(fastq)     | 4DN (4DNESEQW5QAI) |                                                                                                                           |
| CUT&RUN<br>H3K4me3              | Raw<br>(fastq)     | 4DN (4DNESPE6J9FU) |                                                                                                                           |
| iMARGI                          | Read<br>pairs      | 4DN (4DNES9Y1GHK4) | Only interchromosomal repetitive<br>element (RE)-containing chromatin-<br>associated RNAs (caRNAs) read pairs<br>are used |

The iMARGI datasets used for this paper are as follows:

| Cell line | DCIC accession |
|-----------|----------------|
|-----------|----------------|

|       |              |
|-------|--------------|
| H1    | 4DNESNOJ7HY7 |
| HFFc6 | 4DNES9Y1GHK4 |
| K562  | 4DNESIKCVASO |

The bigwig tracks of iMARGI's RNA reads are as follows:

| Cell line | Treatment | Strand | DCIC accession |
|-----------|-----------|--------|----------------|
| H1        | Control   | Plus   | 4DNFIOYVWEYZ   |
| H1        | Control   | Minus  | 4DNFI2LXIREI   |

#### 4. Methods for Integrated Genome Structure Modeling

##### Datasets

The 4DN accession codes to the input data used in simulating and analyzing the genome structures are given in the table below.

|                      | Hi-ESC                                 | HFFc6                                  |
|----------------------|----------------------------------------|----------------------------------------|
| <b>Ensemble Hi-C</b> | 4DNESX75DD7R {Akgol Oksuz, 2021 #1887} | 4DNESNMAAN97 {Akgol Oksuz, 2021 #1887} |
| <b>Lamina DamID</b>  | 4DNESXKBPZKQ                           | 4DNESXZ4FW4T                           |
| <b>SPRITE</b>        | 4DNESASBN1JK {Bhat, 2023 #1958}        | 4DNESJYGTI8S {Bhat, 2023 #1958}        |
| <b>TSA-seq</b>       | 4DNFI625PP2A {Zhang, 2021 #1892}       | 4DNFI6FTPH5V {Zhang, 2021 #1892}       |
| <b>RNA-seq</b>       | 4DNES3IOYG74                           | 4DNESFH3EHTU                           |

|                         |                                                                                                                                                                                                                                                                                                                                                                                                                                                                                                                                                                                                                                                                                                                                 |                                                                                                                                                                                                                                                                                                                                                                   |
|-------------------------|---------------------------------------------------------------------------------------------------------------------------------------------------------------------------------------------------------------------------------------------------------------------------------------------------------------------------------------------------------------------------------------------------------------------------------------------------------------------------------------------------------------------------------------------------------------------------------------------------------------------------------------------------------------------------------------------------------------------------------|-------------------------------------------------------------------------------------------------------------------------------------------------------------------------------------------------------------------------------------------------------------------------------------------------------------------------------------------------------------------|
|                         | GSE75748 {Chu, 2016 #1959}                                                                                                                                                                                                                                                                                                                                                                                                                                                                                                                                                                                                                                                                                                      | GSE75748 {Chu, 2016 #1959}                                                                                                                                                                                                                                                                                                                                        |
| <b>Histone ChIP-seq</b> | <p>ENCFF986PCY {Roadmap Epigenomics Consortium, 2015 #1286}</p> <p>ENCFF088MXE {Roadmap Epigenomics Consortium, 2015 #1286}</p> <p>ENCFF084JKQ {Roadmap Epigenomics Consortium, 2015 #1286}</p> <p>ENCFF183MHJ {Roadmap Epigenomics Consortium, 2015 #1286}</p> <p>ENCFF860NVB {Roadmap Epigenomics Consortium, 2015 #1286}</p> <p>ENCFF401PZS {Roadmap Epigenomics Consortium, 2015 #1286}</p> <p>ENCFF156JZY {Roadmap Epigenomics Consortium, 2015 #1286}</p> <p>ENCFF065VIF {Roadmap Epigenomics Consortium, 2015 #1286}</p> <p>ENCFF445UVT {Roadmap Epigenomics Consortium, 2015 #1286}</p> <p>ENCFF488THD {Roadmap Epigenomics Consortium, 2015 #1286}</p> <p>ENCFF780FNS {Roadmap Epigenomics Consortium, 2015 #1286}</p> | <p>ENCFF426TLD {ENCODE-Project-Consortium, 2012 #1015}</p> <p>ENCFF792IOR {ENCODE-Project-Consortium, 2012 #1015}</p> <p>ENCFF994SSG {ENCODE-Project-Consortium, 2012 #1015}</p> <p>ENCFF690KUY {ENCODE-Project-Consortium, 2012 #1015}</p> <p>ENCFF995LLA {ENCODE-Project-Consortium, 2012 #1015}</p> <p>ENCFF070SWD {ENCODE-Project-Consortium, 2012 #1015}</p> |

## 5. Methods for single cell 3D genome analysis

### **scHi-C data**

ScHi-C data can be found here:

For clone 6:

<https://data.4dnucleome.org/experiment-set-replicates/4DNESJQ4RXY5/>

and for clone 28:

<https://data.4dnucleome.org/experiment-set-replicates/4DNESF829JOW/>

## Data accessibility

### Hi-C

- h1ESC Hi-C 2.5 source: <https://data.4dnucleome.org/files-processed/4DNFI82R42AD/>
- h1ESC dot domains: <https://data.4dnucleome.org/files-processed/4DNFIW5EII02/>
- h1ESC dotless domains: <https://data.4dnucleome.org/files-processed/4DNFIU7GTTMW/>
- h1ESC dot boundaries: <https://data.4dnucleome.org/files-processed/4DNFIWNJ5RR7/>
- h1ESC dotless boundaries: <https://data.4dnucleome.org/files-processed/4DNFIT6QE9YU/>
- h1ESC loops: <https://data.4dnucleome.org/files-processed/4DNFIEEF14ST/>
- h1ESC TADs/subTADs: <https://data.4dnucleome.org/files-processed/4DNFIR94OF6S/>

### 16 fraction Repli-seq

- h1ESC raw fastq: <https://data.4dnucleome.org/experiment-sets/4DNESXRBILXJ/>
- h1ESC read depth scaled normalized array for IZ calls & visualization: <https://data.4dnucleome.org/files-processed/4DNFI3N8GHKR/>
- h1ESC Early, Early-mid, Late IZs on read depth normalized: <https://data.4dnucleome.org/files-processed/4DNFIRF7WZ3H/>

### RNA

- h1ESC RNA-seq source: <https://www.encodeproject.org/experiments/ENCSR537BCG/>
- h1ESC RNA-seq processed file: <https://www.encodeproject.org/files/ENCFF584VXW/> (plus strand signal of unique reads) <https://www.encodeproject.org/files/ENCFF307LLA/> (minus strand signal of unique reads)
- h1ESC raw files: [http://sysbiocomp.ucsd.edu/public/wenxingzhao/H1\\_new/05-09-2019\\_Tri\\_iMARGI\\_H1-control.RNA.minus.bw;](http://sysbiocomp.ucsd.edu/public/wenxingzhao/H1_new/05-09-2019_Tri_iMARGI_H1-control.RNA.minus.bw;)

[http://sysbiocomp.ucsd.edu/public/wenxingzhao/H1\\_new/05-09-2019\\_Tri\\_iMARGI\\_H1-control.RNA.plus.bw](http://sysbiocomp.ucsd.edu/public/wenxingzhao/H1_new/05-09-2019_Tri_iMARGI_H1-control.RNA.plus.bw)

### SPIN states

- h1ESC and HFFc6 SPIN states are in Supplemental Table 1.

### h1ESC

- h1ESC A/B Compartments:  
<https://data.4dnucleome.org/files-processed/4DNFIOUDCJRH/>

### Contact map

- H1ESC: <https://data.4dnucleome.org/files-processed/4DNFIIMZB6Y9/>

### ATAC-seq

- HCT116: <https://www.encodeproject.org/files/ENCFF624HRW/>
- mESC: <https://data.4dnucleome.org/files-processed/4DNFI6HY3NE7/>
- H1ESC: <https://data.4dnucleome.org/files-processed/4DNFICPNO4M5/>

### Histones marks

- H1ESC, H2AZ: <https://data.4dnucleome.org/experiments-seq/4DNEXHDA1L74/> (reanalyzed)
- H1ESC, H3K27Ac: <https://data.4dnucleome.org/experiments-seq/4DNEX5EQJ2P2/> (reanalyzed)
- H1ESC, H3K4me3: <https://data.4dnucleome.org/experiment-set-replicates/4DNESPE6J9FU>
- H1ESC, H3K4me1: <https://data.4dnucleome.org/experiments-seq/4DNEXOKGNAEQ/> (reanalyzed)
- HCT116, H2AZ: <https://data.4dnucleome.org/files-processed/4DNFIPHO57I2/>
- HCT116, H3K27Ac: <https://data.4dnucleome.org/files-processed/4DNFIYNC2EO5/>
- HCT116, H3K4me3: <https://data.4dnucleome.org/files-processed/4DNFIT9DN6JI/>
- mESC, H3K27Ac: <https://data.4dnucleome.org/files-processed/4DNFIXE23VC7/>
- mESC, H3K4me3: <https://data.4dnucleome.org/files-processed/4DNFIQYJLKKH/>
- mESC H2AZ:  
<https://www.ncbi.nlm.nih.gov/geo/query/acc.cgi?acc=GSM4802378>  
(reanalyzed)

## Gene expression

- HCT116: <https://www.encodeproject.org/files/ENCFF766TYC/>
- mESC: <https://data.4dnucleome.org/files-processed/4DNFI4XVSIFH/>

## IZs

|        |     |                                                                                     |                                                                                                                                   |
|--------|-----|-------------------------------------------------------------------------------------|-----------------------------------------------------------------------------------------------------------------------------------|
| H1ESC  | IZs | 4DNFI5OBN63G                                                                        | <a href="https://data.4dnucleome.org/files-processed/4DNFI5OBN63G">https://data.4dnucleome.org/files-processed/4DNFI5OBN63G</a>   |
| HCT116 | IZs | <a href="https://data.4dnucleome.org/files-processed/4DNFIYO3H24N">4DNFIYO3H24N</a> | <a href="https://data.4dnucleome.org/files-processed/4DNFILNNSFMD/">https://data.4dnucleome.org/files-processed/4DNFILNNSFMD/</a> |
| mESC   | IZs | <a href="https://data.4dnucleome.org/files-processed/4DNFI53E1A38">4DNFI53E1A38</a> | <a href="https://data.4dnucleome.org/files-processed/4DNFI53E1A38/">https://data.4dnucleome.org/files-processed/4DNFI53E1A38/</a> |

## 2-fractions repli-seq

- H1ESC: <https://data.4dnucleome.org/experiments-seq/4DNFIWSH27RS> ;  
<https://data.4dnucleome.org/experiments-seq/4DNFIQ6F59NT>
- HCT116: <https://data.4dnucleome.org/files-processed/4DNFIM9S18WO/> ;  
<https://data.4dnucleome.org/files-processed/4DNFIC4VUF86>
- mESC: <https://data.4dnucleome.org/files-processed/4DNFIPB7M5B6> ;  
<https://data.4dnucleome.org/files-processed/4DNFIRHK7RZF>

## Insulation score

- H1ESC: <https://data.4dnucleome.org/files-processed/4DNFIUK3UVZX>
- HCT116: <https://data.4dnucleome.org/files-processed/4DNFIGKFF445/>
- mESC: <https://data.4dnucleome.org/files-processed/4DNFI2LE1KZL/>

## iMARGI datasets

- h1ESC: <https://data.4dnucleome.org/experiment-set-replicates/4DNESNOJ7HY7/>
